# Supplementary material for: Photoreduction of carbon dioxide enhanced by Cu atoms doped in a Pd cluster supported on TiO2: mechanism, selectivity, and catalytic descriptor
Source: Royal Society of Chemistry journal article supplement (doi:10.1039/d5ta00975h), 2025-01-01
Supplement: d5ta00975h1.pdf [file d5ta00975h1.pdf]

## **Supporting Information**

# **Photoreduction of Carbon Dioxide Enhanced by Cu Atoms Doped within the Pd Cluster Supported on TiO<sub>2</sub>: Mechanism, Selectivity, and Catalytic Descriptor**

Jia-Jia Yang<sup>1\*</sup>, Shi-Ru Zhang<sup>2</sup>, Feng Li<sup>1</sup>, Laicai Li<sup>1</sup>, Wei-Hai Fang<sup>2</sup>, and Ganglong Cui<sup>2\*</sup>

<sup>1</sup>College of Chemistry and Material Science, Sichuan Normal University, Chengdu 610068, China and <sup>2</sup>Key Laboratory of Theoretical and Computational Photochemistry, Ministry of Education, College of Chemistry, Beijing Normal University, Beijing 100875, China

\*E-mail: [jiajiayang@sicnu.edu.cn](mailto:jiajiayang@sicnu.edu.cn); [ganglong.cui@bnu.edu.cn](mailto:ganglong.cui@bnu.edu.cn)

## **Contents**

|                                                         |            |
|---------------------------------------------------------|------------|
| <b>Figures.....</b>                                     | <b>S2</b>  |
| <b>Section I: Microkinetic Simulation Details .....</b> | <b>S27</b> |
| <b>Section II: Water Photolysis .....</b>               | <b>S29</b> |
| <b>Tables .....</b>                                     | <b>S35</b> |
| <b>References.....</b>                                  | <b>S39</b> |

## Figures

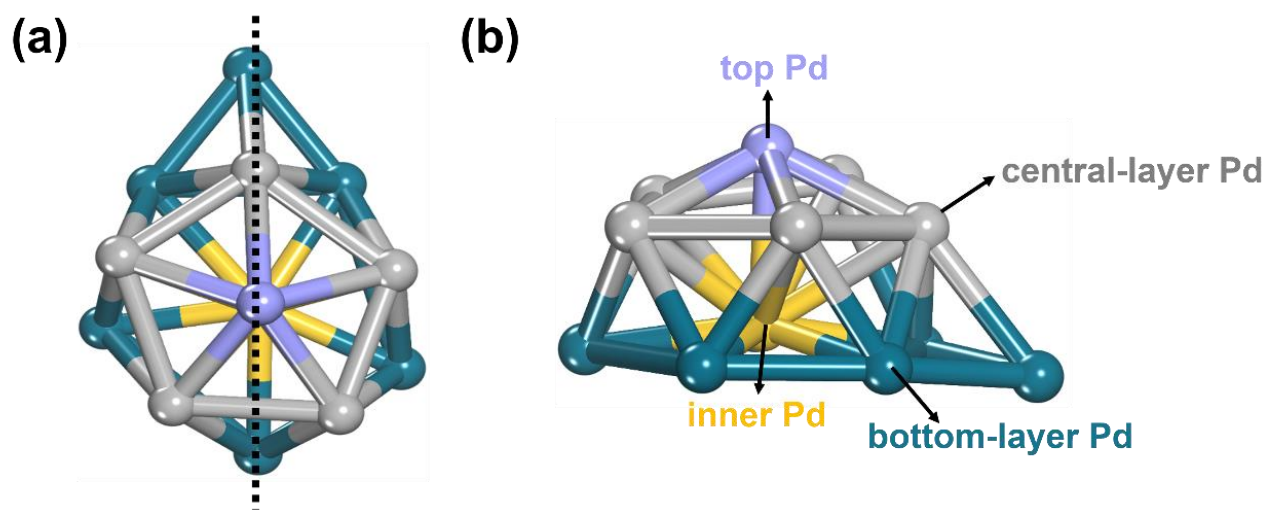

Figure S1. (a) The structure and (b) related classification of Pd atoms in the Pd<sub>13</sub> nanocluster supported on the TiO<sub>2</sub>(101) surface. The top layer has one Pd atom (purple), the central layer has five Pd atoms (gray), the inner layer has one Pd atom (yellow), and the bottom layer has six Pd atoms (cyan).

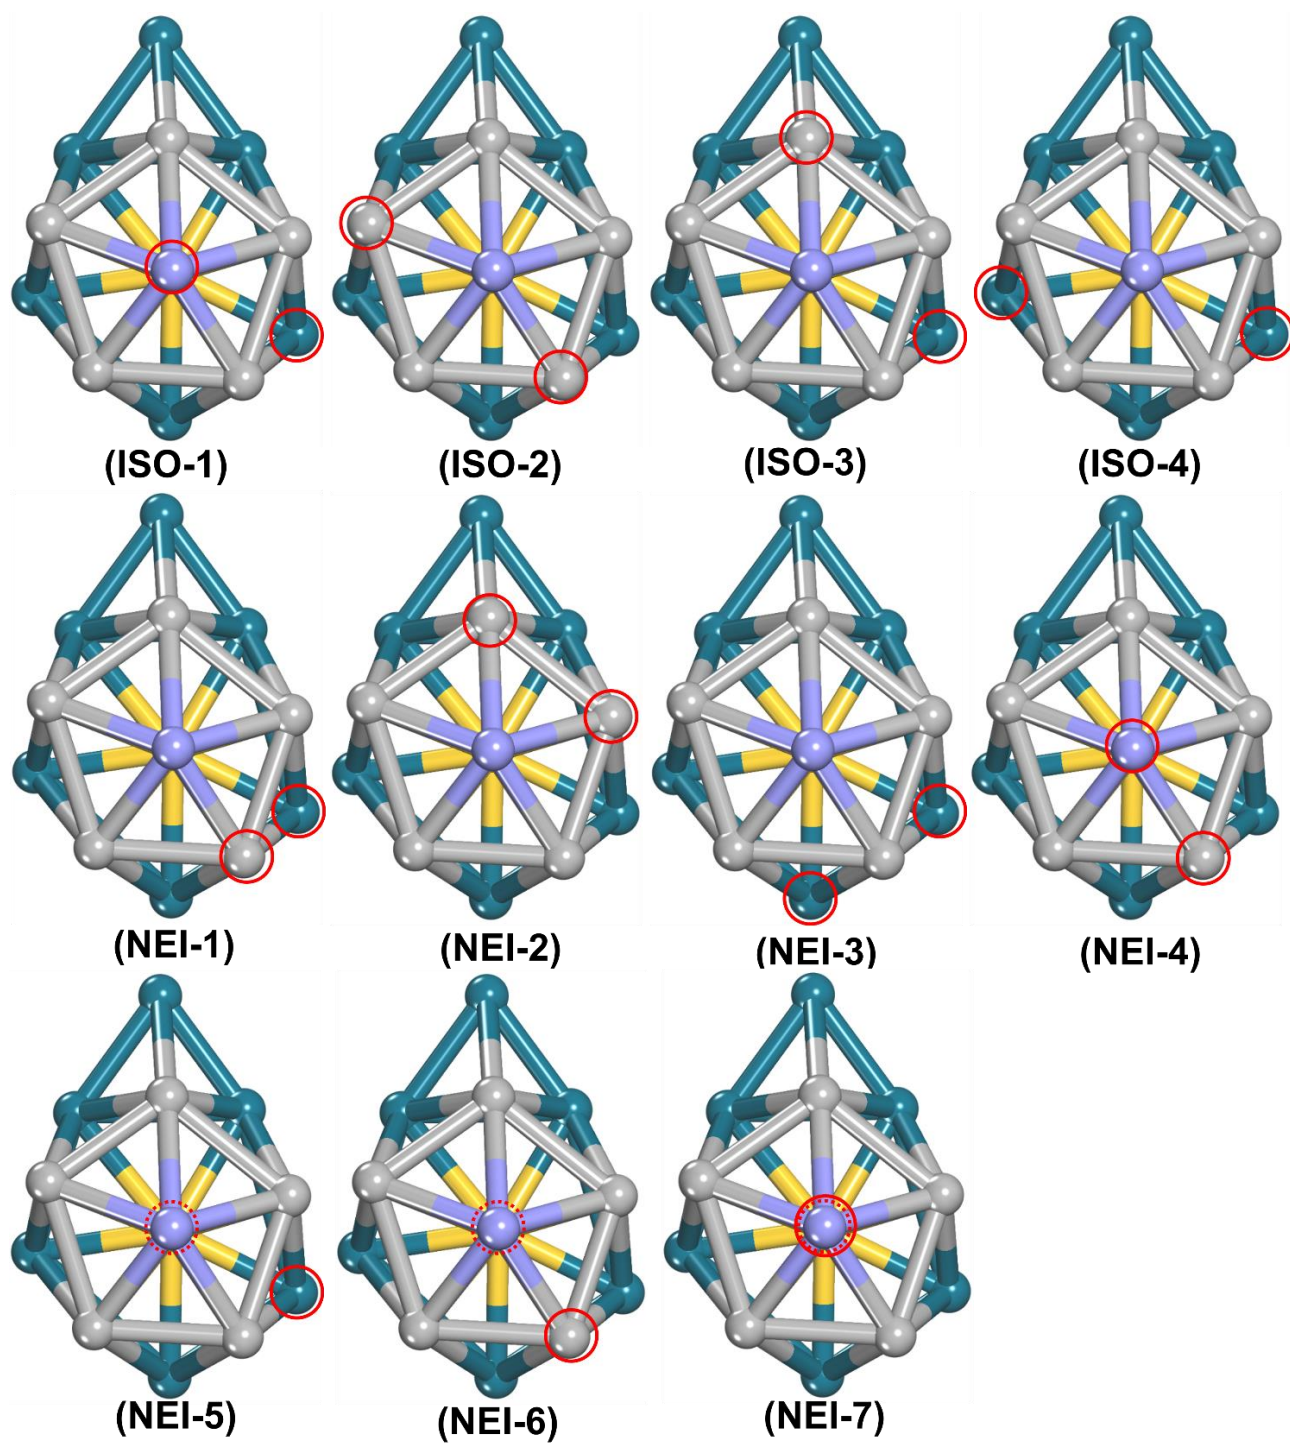

Figure S2. The location of the two Cu atoms (red circles) within the Pd<sub>13</sub> nanocluster. For ISO-1 to ISO-4, the two Cu atoms are isolated spatially without any Cu-Cu bond formed; while, for NEI-1 to NEI-7, the two Cu atoms are spatially close to each other forming a Cu-Cu bond.

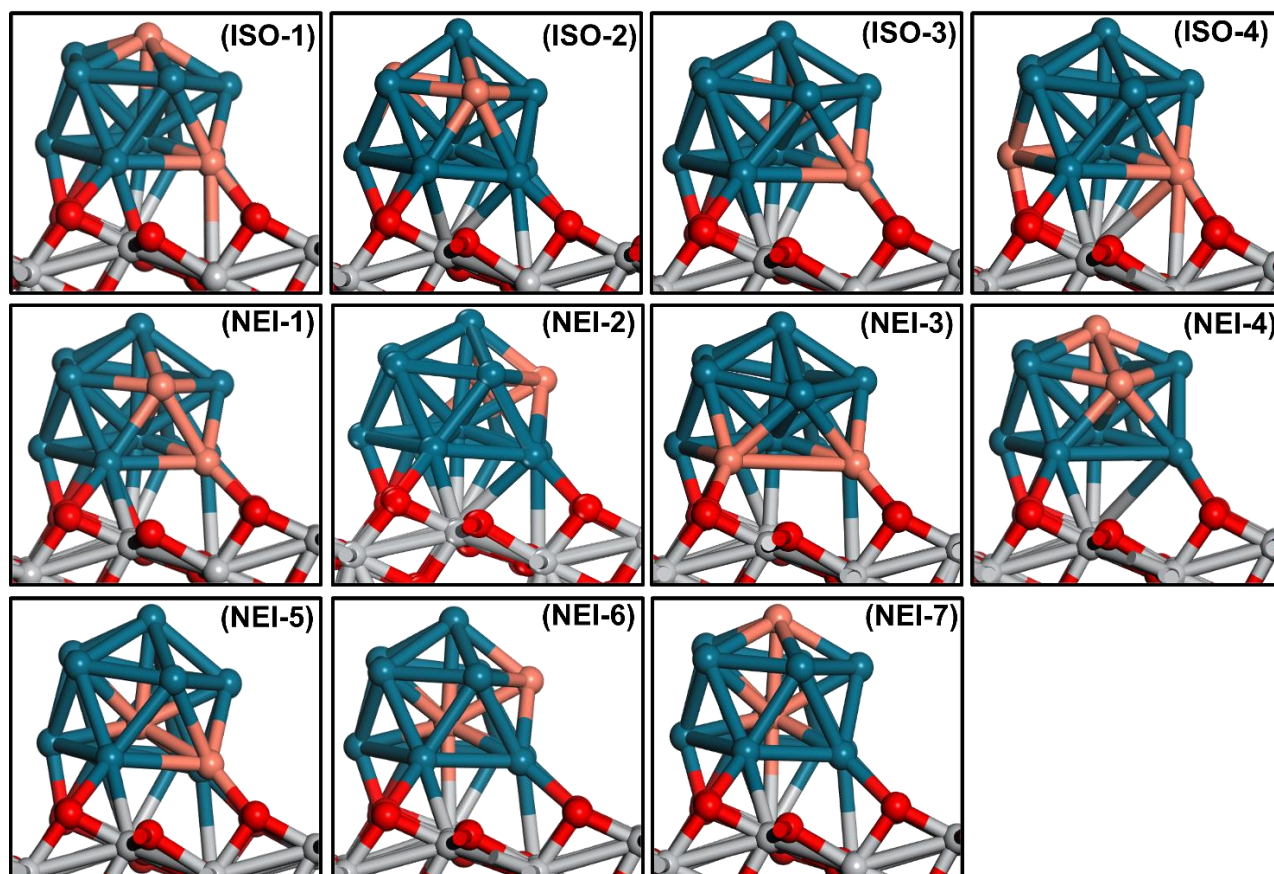

Figure S3. The eleven interface models of  $\text{Pd}_{11}\text{Cu}_2@\text{TiO}_2$  with the two Cu atoms located at the different positions of  $\text{Pd}_{13}$ . For ISO-1 to ISO-4, the two Cu atoms are isolated spatially, and for NEI-1 to NEI-7, the two Cu atoms are spatially close to each other forming a Cu-Cu bond.



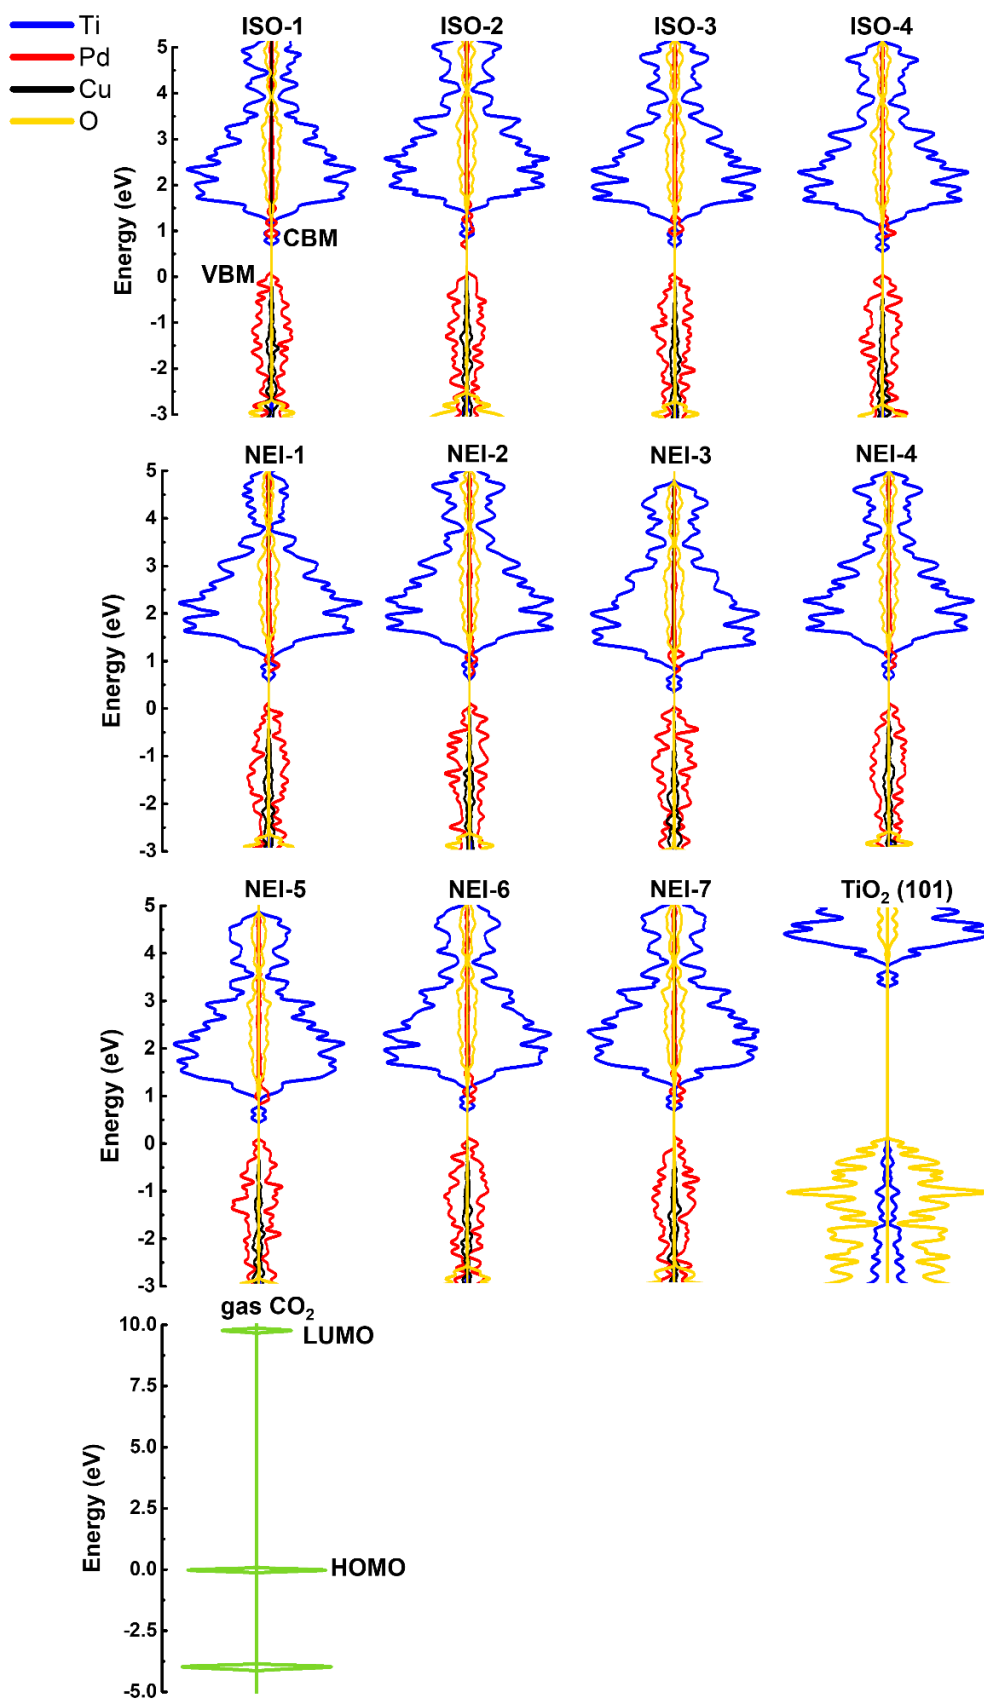

Figure S4. The DOSs of the eleven models of Pd<sub>11</sub>Cu<sub>2</sub>@TiO<sub>2</sub>(101), TiO<sub>2</sub>(101), and CO<sub>2</sub> gas. The Fermi level is set to the zero point.

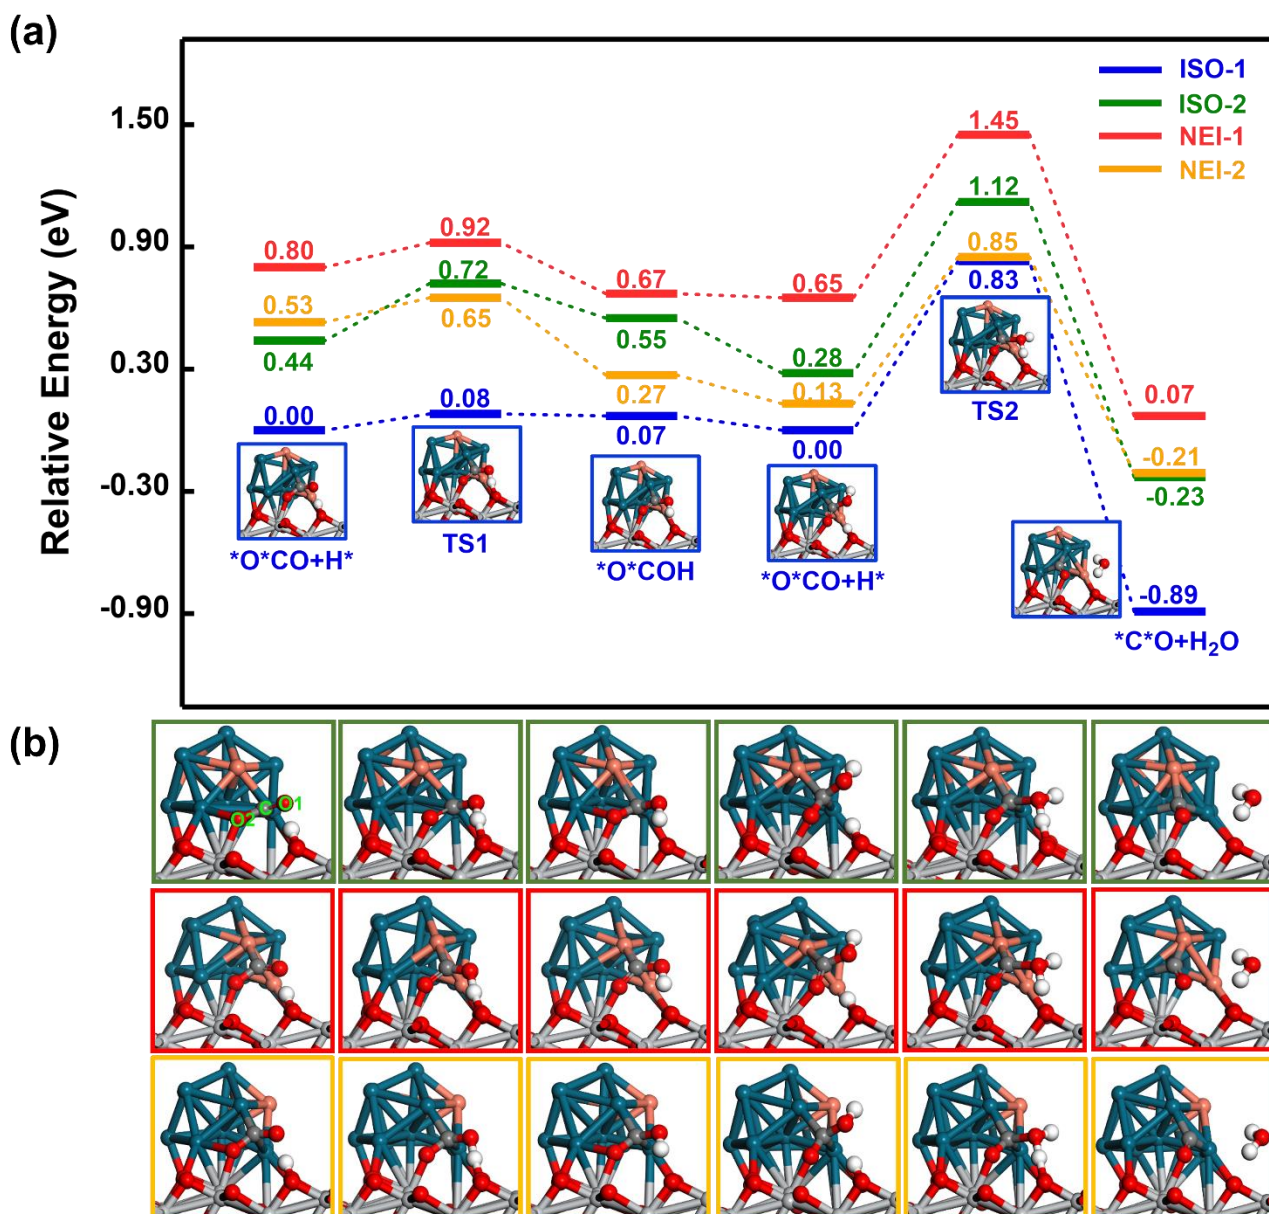

Figure S5. (a) The reaction pathways for  $^*\text{O}^*\text{CO}$  to  $^*\text{C}^*\text{O}$  related to the four interface models (ISO-1, ISO-2, NEI-1, and NEI-2) of  $\text{Pd}_{11}\text{Cu}_2@\text{TiO}_2$ , in which O1 of  $^*\text{O}^*\text{CO}$  is consecutively hydrogenated, followed by a dehydration reaction. Relevant transition states and intermediates related to these four models are also shown in panels a (ISO-1) and b (ISO-2, NEI-1, and NEI-2). Ti, O, Pd, Cu, C, and H atoms are in gray, red, cyan, orange, dark grey, and white, respectively.

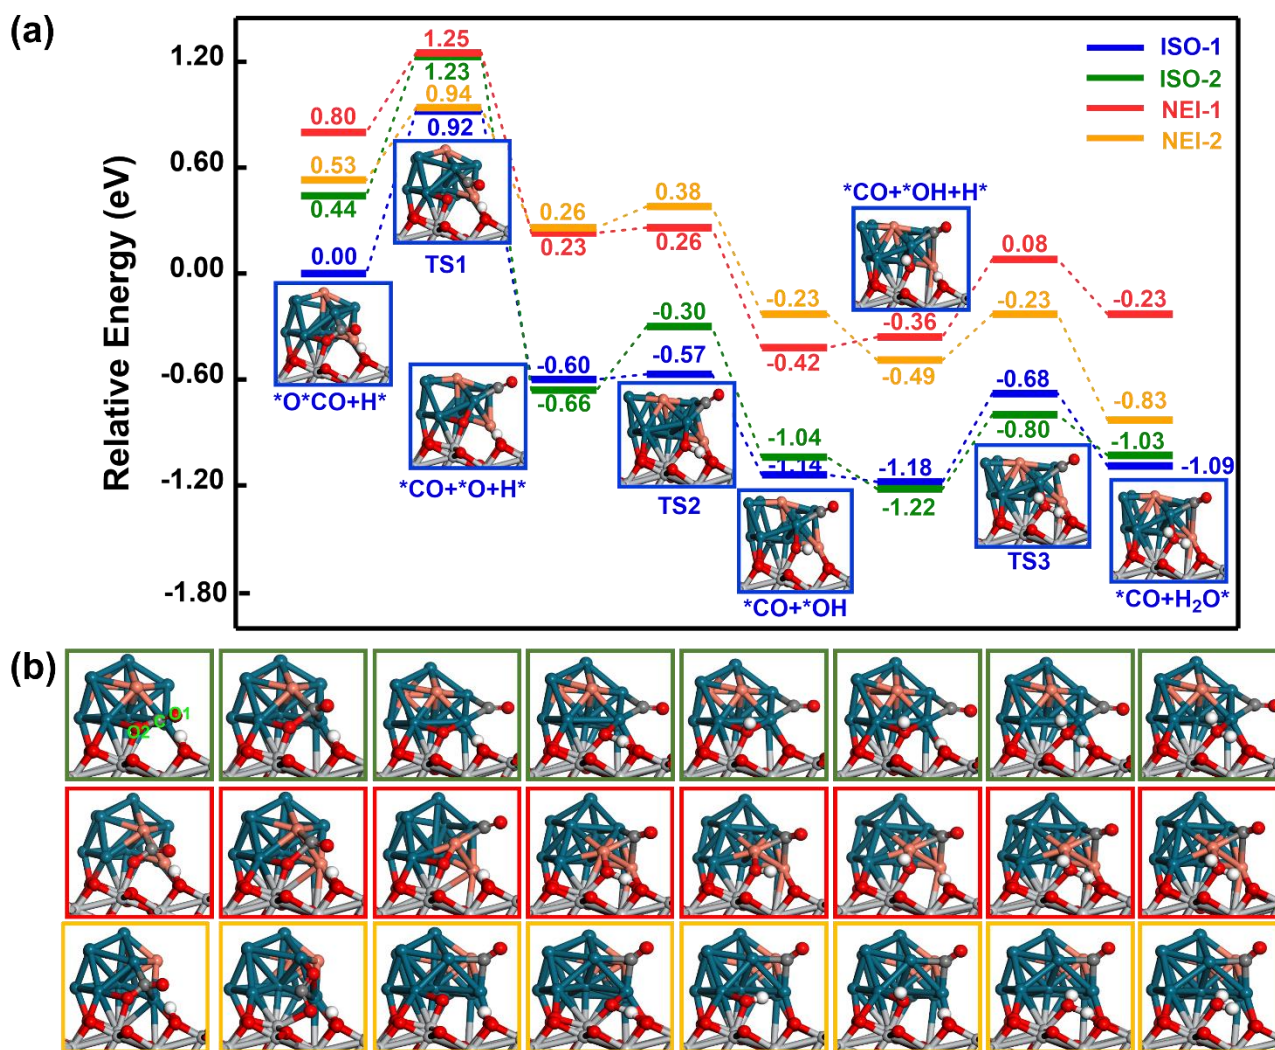

Figure S6. (a) The reaction pathways for  $*O*CO$  to  $*CO$  related to the four interface models (ISO-1, ISO-2, NEI-1, and NEI-2) of  $Pd_{11}Cu_2@TiO_2$ , in which  $*CO_2$  dissociates its C-O2 bond and  $O_2^*$  is hydrogenated to  $H_2O$ . Relevant transition states and intermediates related to these four models are also shown in panels a (ISO-1) and b (ISO-2, NEI-1, and NEI-2). Ti, O, Pd, Cu, C, and H atoms are in gray, red, cyan, orange, dark grey, and white, respectively.

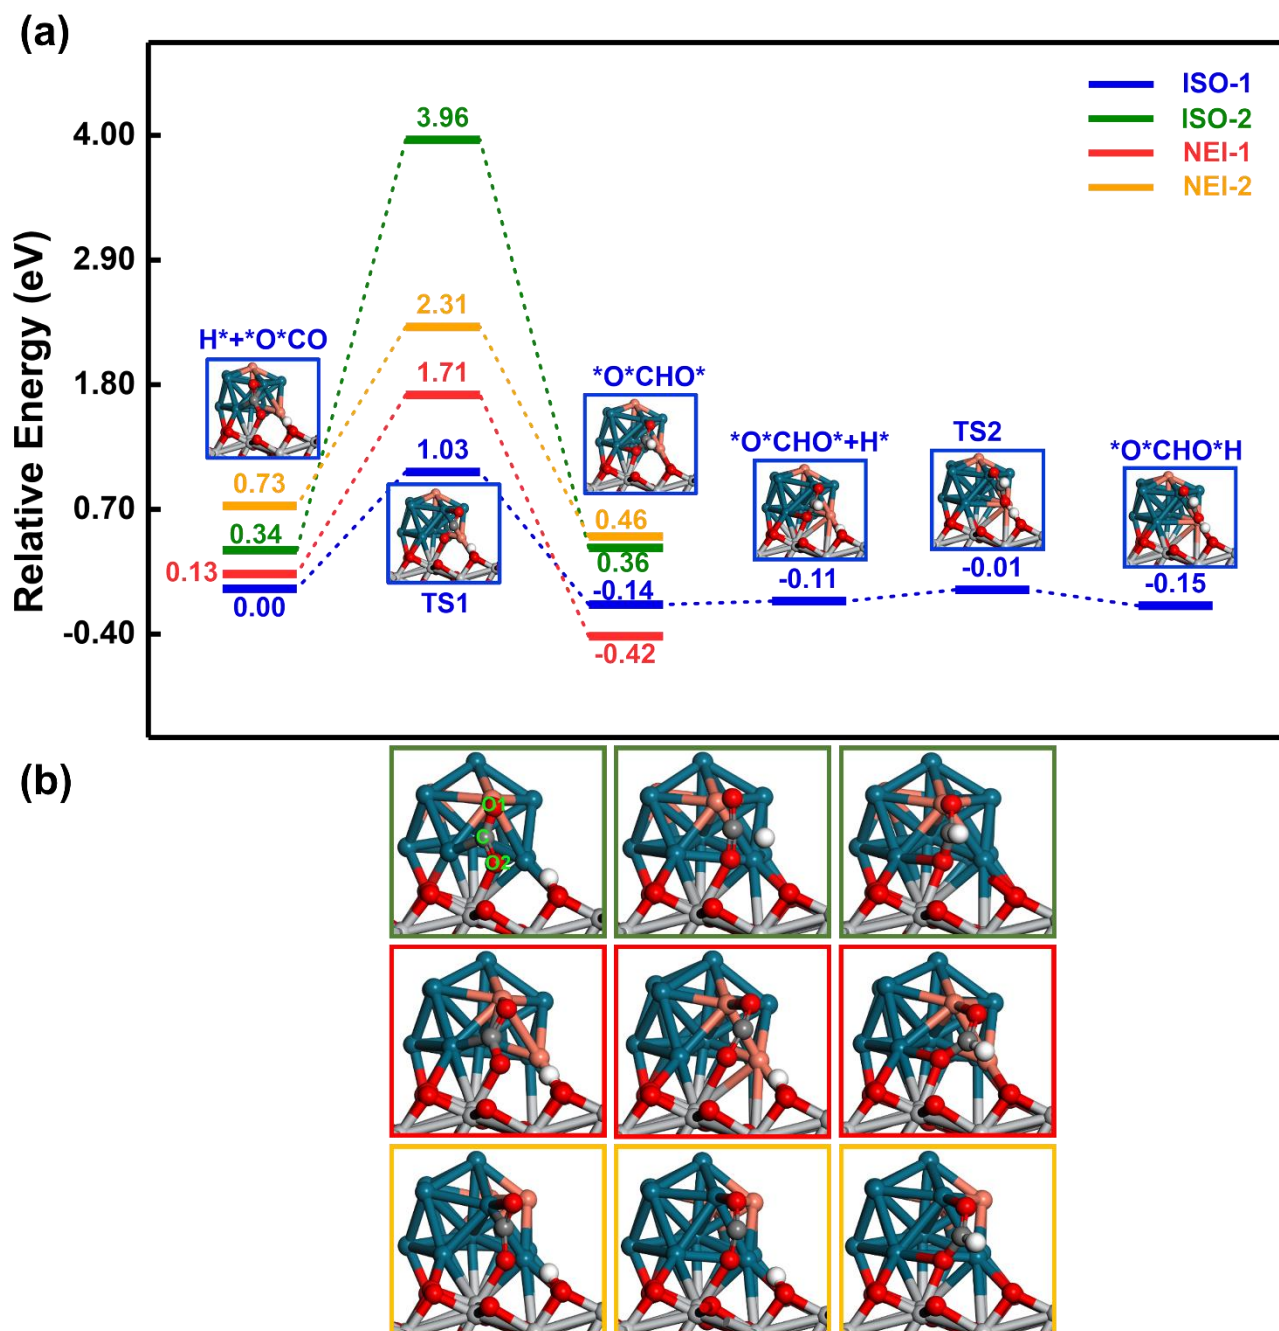

Figure S7. (a) The reaction pathways for  $\text{*O*CO}$  to  $\text{CH*OOH}$  (or  $\text{*OCHO*}$ ) related to the four interface models (ISO-1, ISO-2, NEI-1, and NEI-2) of  $\text{Pd}_{11}\text{Cu}_2\text{@TiO}_2$ . Relevant transition states and intermediates related to these four models are also shown in panels a (ISO-1) and b (ISO-2, NEI-1, and NEI-2). Ti, O, Pd, Cu, C, and H atoms are in gray, red, cyan, orange, dark grey, and white, respectively.



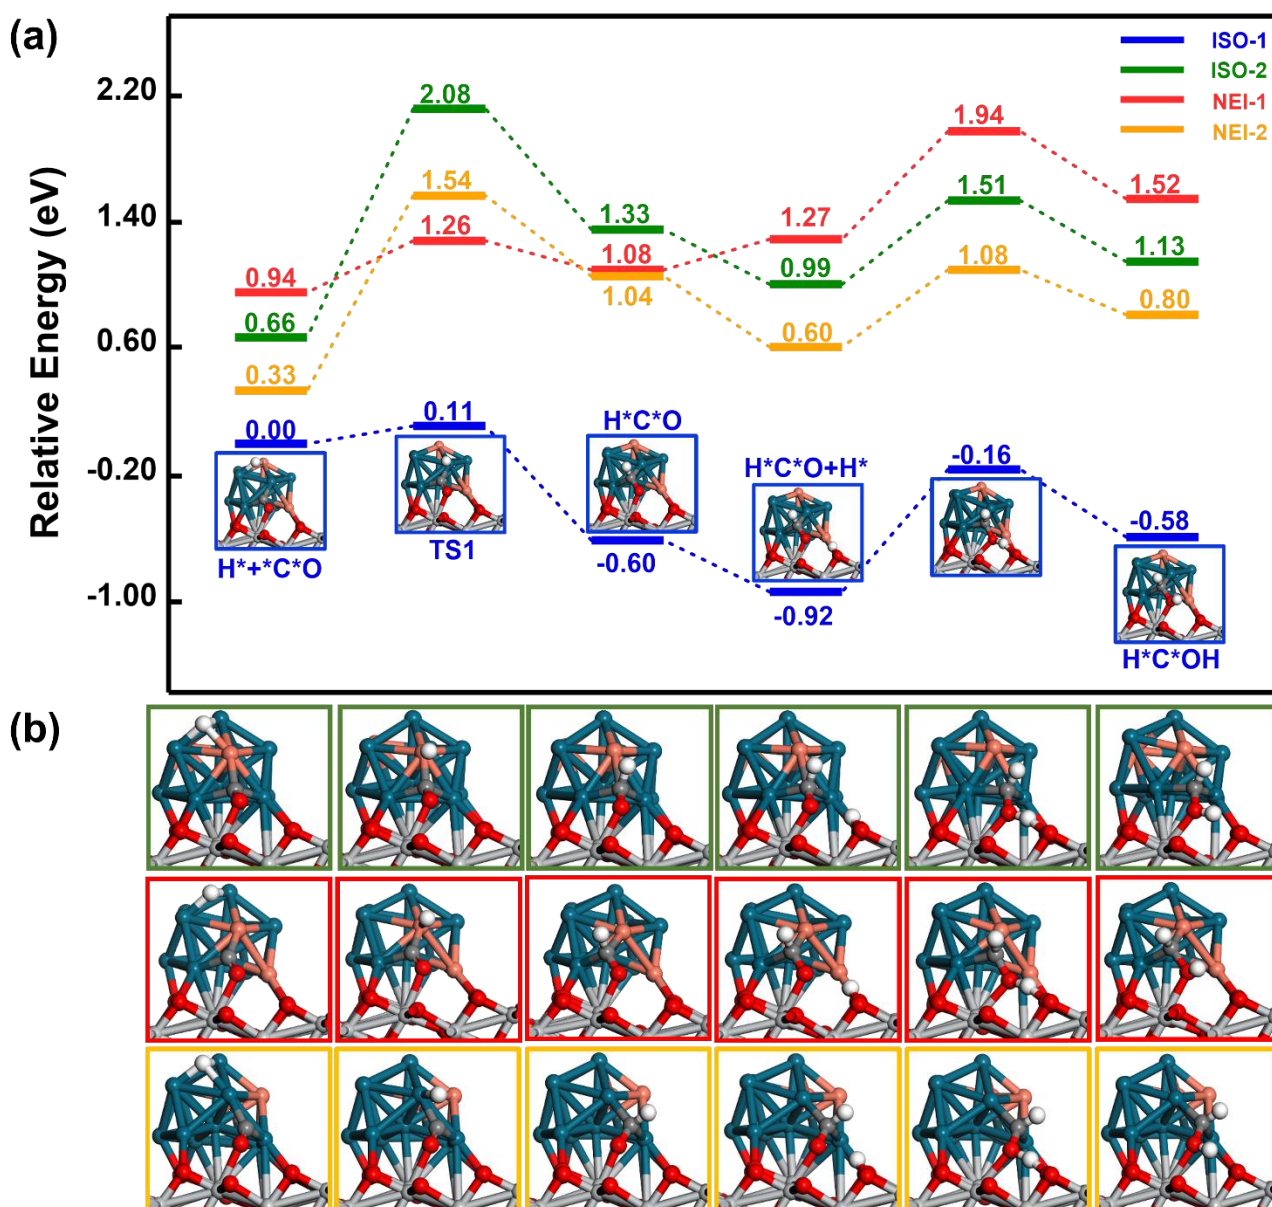

Figure S8. (a) The reaction pathways for  $\text{C}^*\text{O}$  to  $\text{H}^*\text{C}^*\text{OH}$  related to the four interface models (ISO-1, ISO-2, NEI-1, and NEI-2) of  $\text{Pd}_{11}\text{Cu}_2@\text{TiO}_2$ , in which  $\text{C}^*$  and  $\text{O}^*$  are hydrogenated sequentially. Relevant transition states and intermediates related to these four models are also shown in panels a (ISO-1) and b (ISO-2, NEI-1, and NEI-2). Ti, O, Pd, Cu, C, and H atoms are in gray, red, cyan, orange, dark grey, and white, respectively.

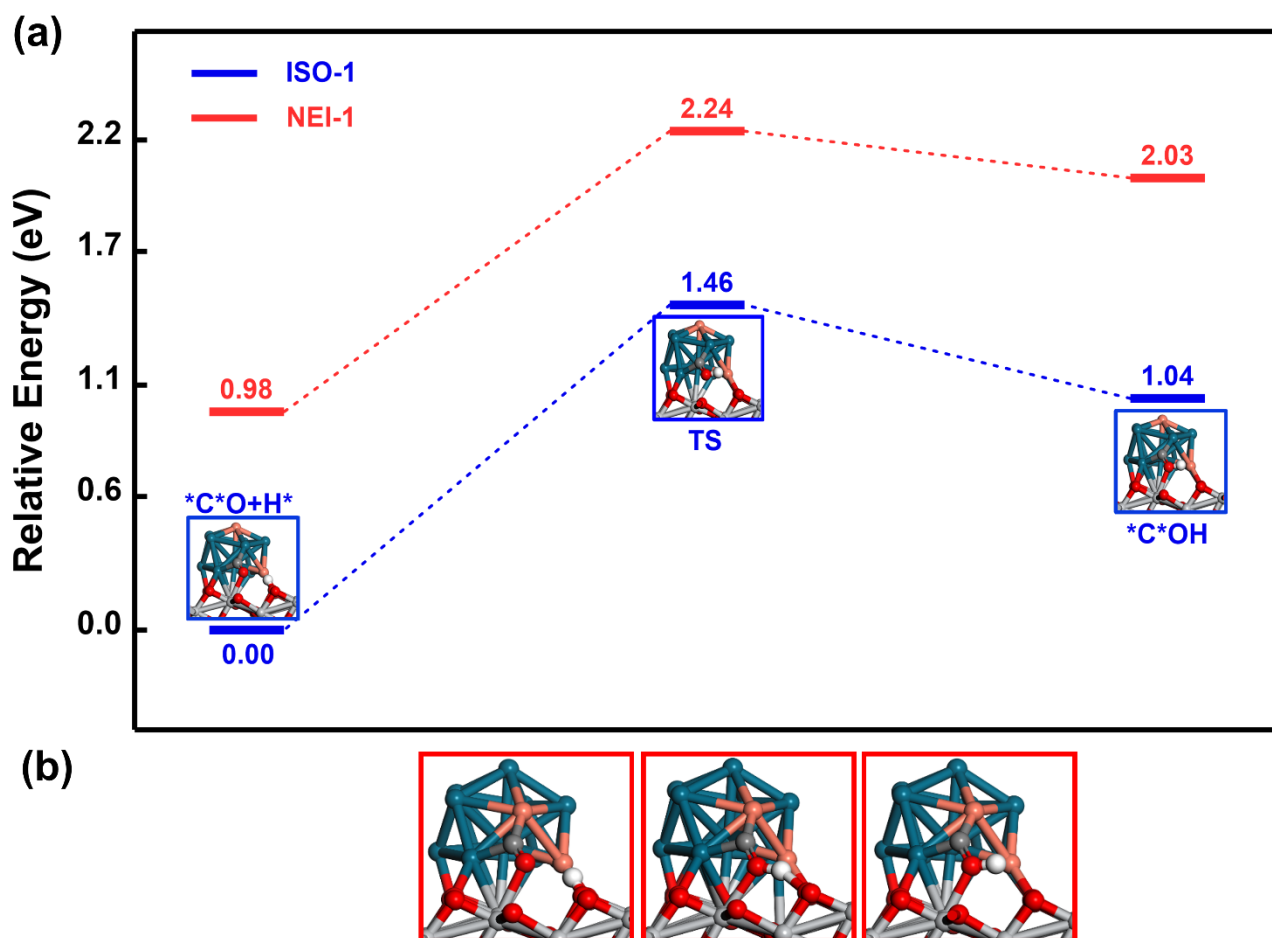

Figure S9. (a) The reaction pathways for  $*C*O$  to  $*C*OH$  related to the ISO-1 and NEI-1 models of  $Pd_{11}Cu_2@TiO_2$ , in which  $*O$  is first hydrogenated. Also shown are transition state and intermediate configurations related to ISO-1 and NEI-1 in panels a (ISO-1) and b (NEI-1). ISO-2 and NEI-2 cannot stabilize the  $*C*OH$  intermediate. Ti, O, Pd, Cu, C, and H atoms are in gray, red, cyan, orange, dark grey, and white, respectively.

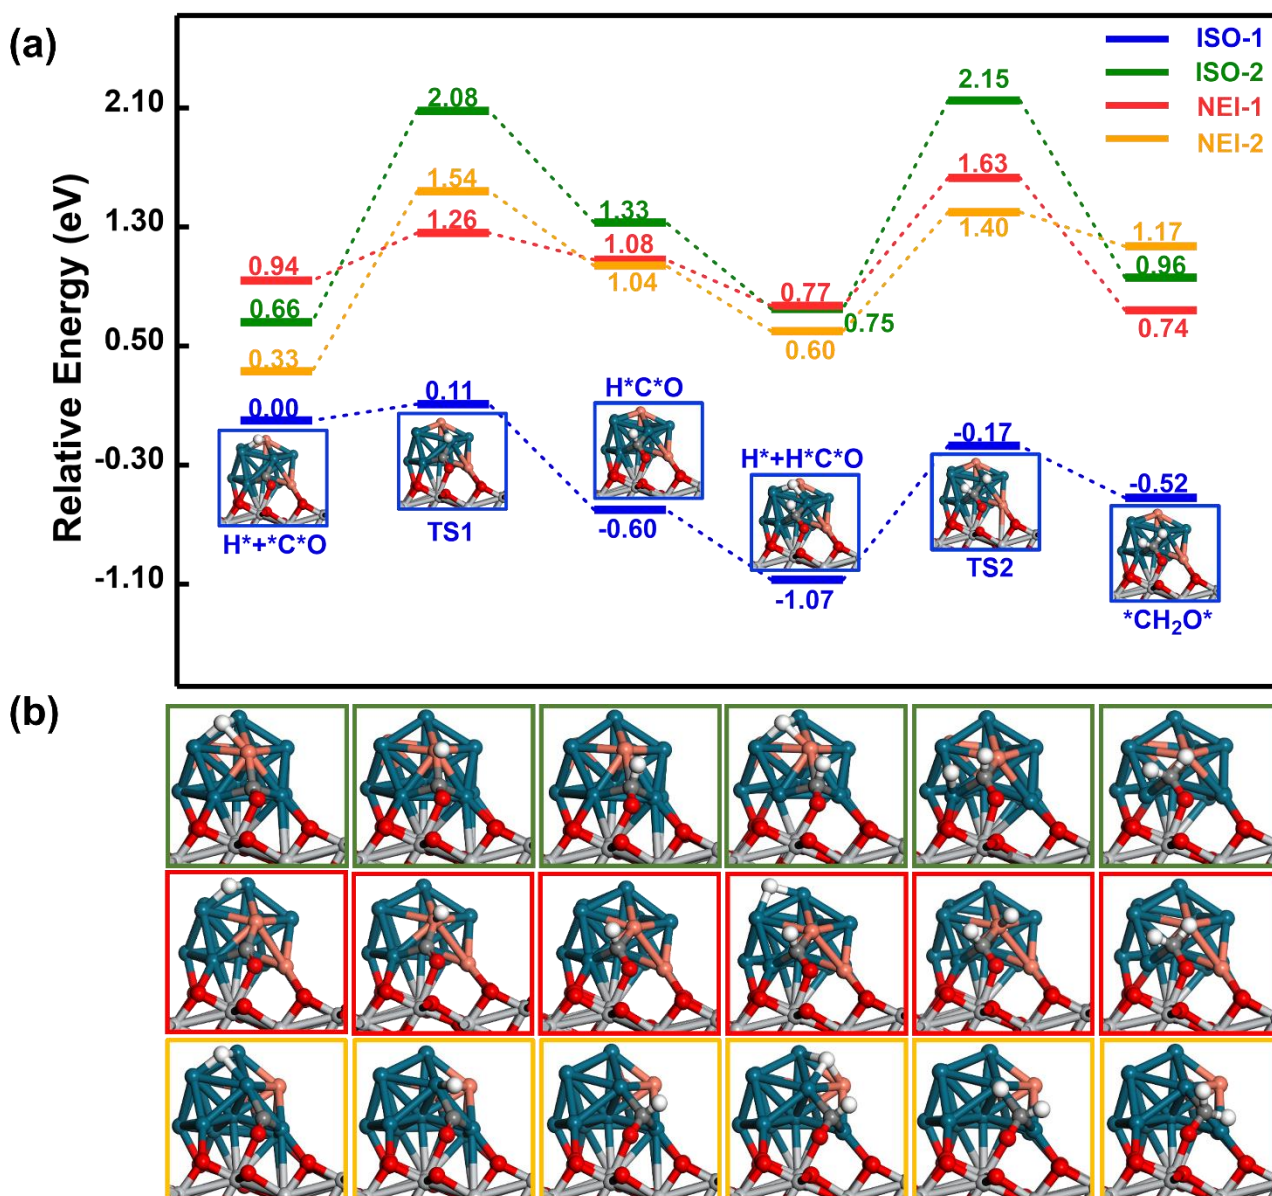

Figure S10. (a) The reaction pathways for  $\text{*C*O}$  to  $\text{*CH}_2\text{O*}$  related to the four interface models (ISO-1, ISO-2, NEI-1, and NEI-2) of  $\text{Pd}_{11}\text{Cu}_2\text{@TiO}_2$ , in which  $\text{*C}$  is consecutively hydrogenated. Relevant transition states and intermediates related to these four models are also shown in panels a (ISO-1) and b (ISO-2, NEI-1, and NEI-2). Ti, O, Pd, Cu, C, and H atoms are in gray, red, cyan, orange, dark grey, and white, respectively.

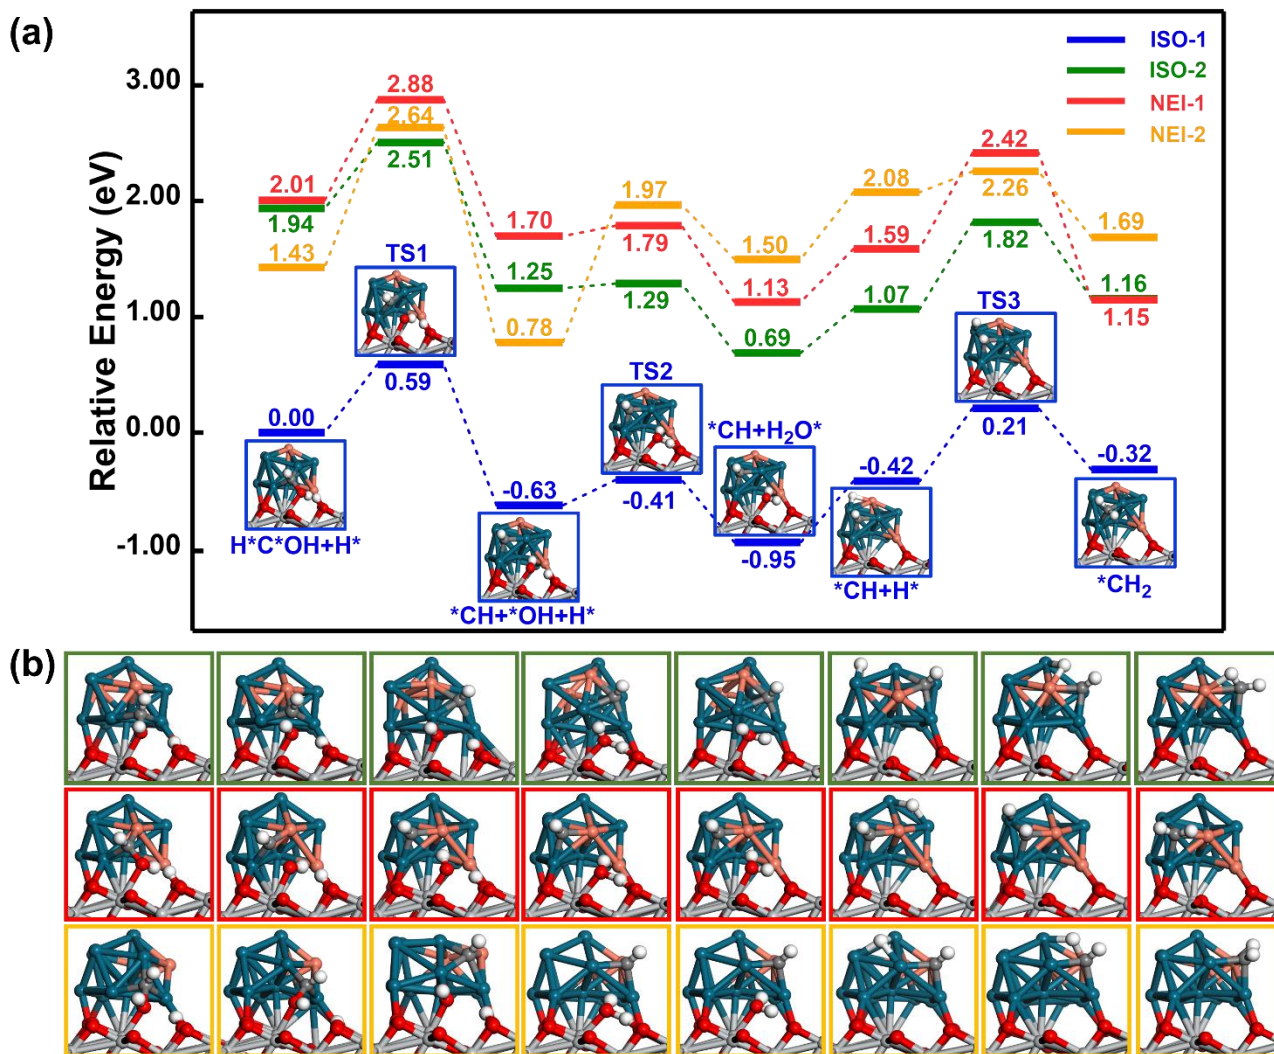

Figure S11. (a) The reaction pathways for H\*C\*OH to \*CH<sub>2</sub> related to the four interface models (ISO-1, ISO-2, NEI-1, and NEI-2) of Pd<sub>11</sub>Cu<sub>2</sub>@TiO<sub>2</sub>, in which H\*C\*OH dissociates its C-O bond, and \*CH and \*OH are hydrogenated to \*CH<sub>2</sub> and H<sub>2</sub>O\*. Relevant transition states and intermediates related to these four models are also shown in panels a (ISO-1) and b (ISO-2, NEI-1, and NEI-2). Ti, O, Pd, Cu, C, and H atoms are in gray, red, cyan, orange, dark grey, and white, respectively.



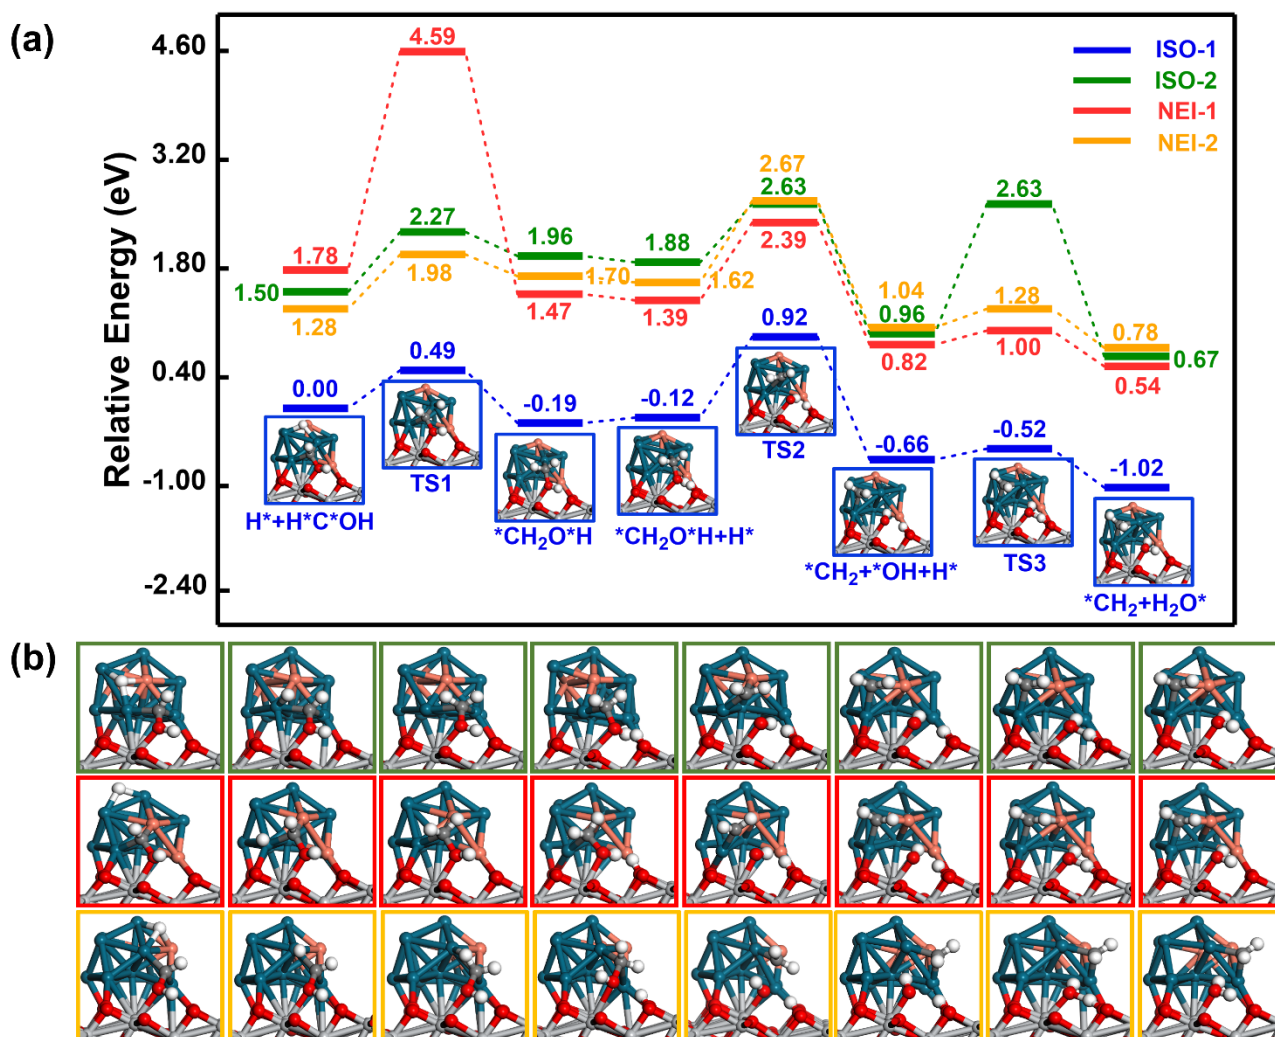

Figure S12. (a) The reaction pathways for  $H^*C^*OH$  to  $*CH_2$  related to the four interface models (ISO-1, ISO-2, NEI-1, and NEI-2) of  $Pd_{11}Cu_2@TiO_2$ , in which  $H^*C^*OH$  is hydrogenated to produce  $*CH_2O^*H$ , followed by the cleavage of the C-O bond. Relevant transition states and intermediates related to these four models are also shown in panels a (ISO-1) and b (ISO-2, NEI-1, and NEI-2). Ti, O, Pd, Cu, C, and H atoms are in gray, red, cyan, orange, dark grey, and white, respectively.

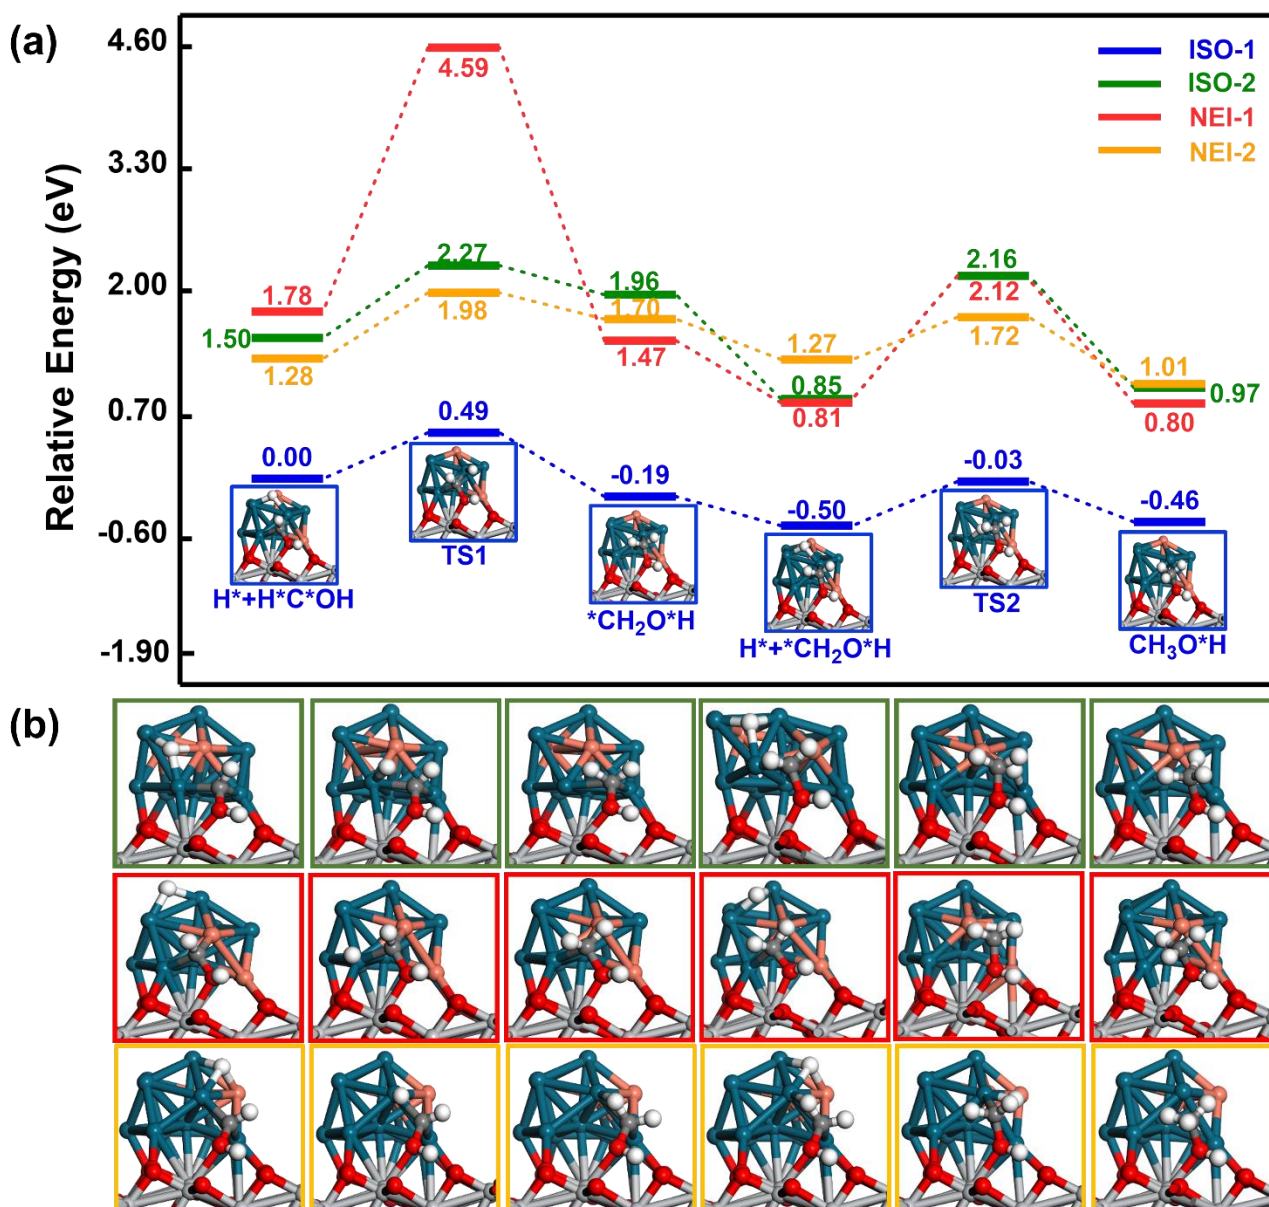

Figure S13. (a) The reaction pathways for  $H^*C^*OH$  to  $CH_3O^*H$  related to the four interface models (ISO-1, ISO-2, NEI-1, and NEI-2) of  $Pd_{11}Cu_2@TiO_2$ . Relevant transition states and intermediates related to these four models are also shown in panels a (ISO-1) and b (ISO-2, NEI-1, and NEI-2). Ti, O, Pd, Cu, C, and H atoms are in gray, red, cyan, orange, dark grey, and white, respectively.

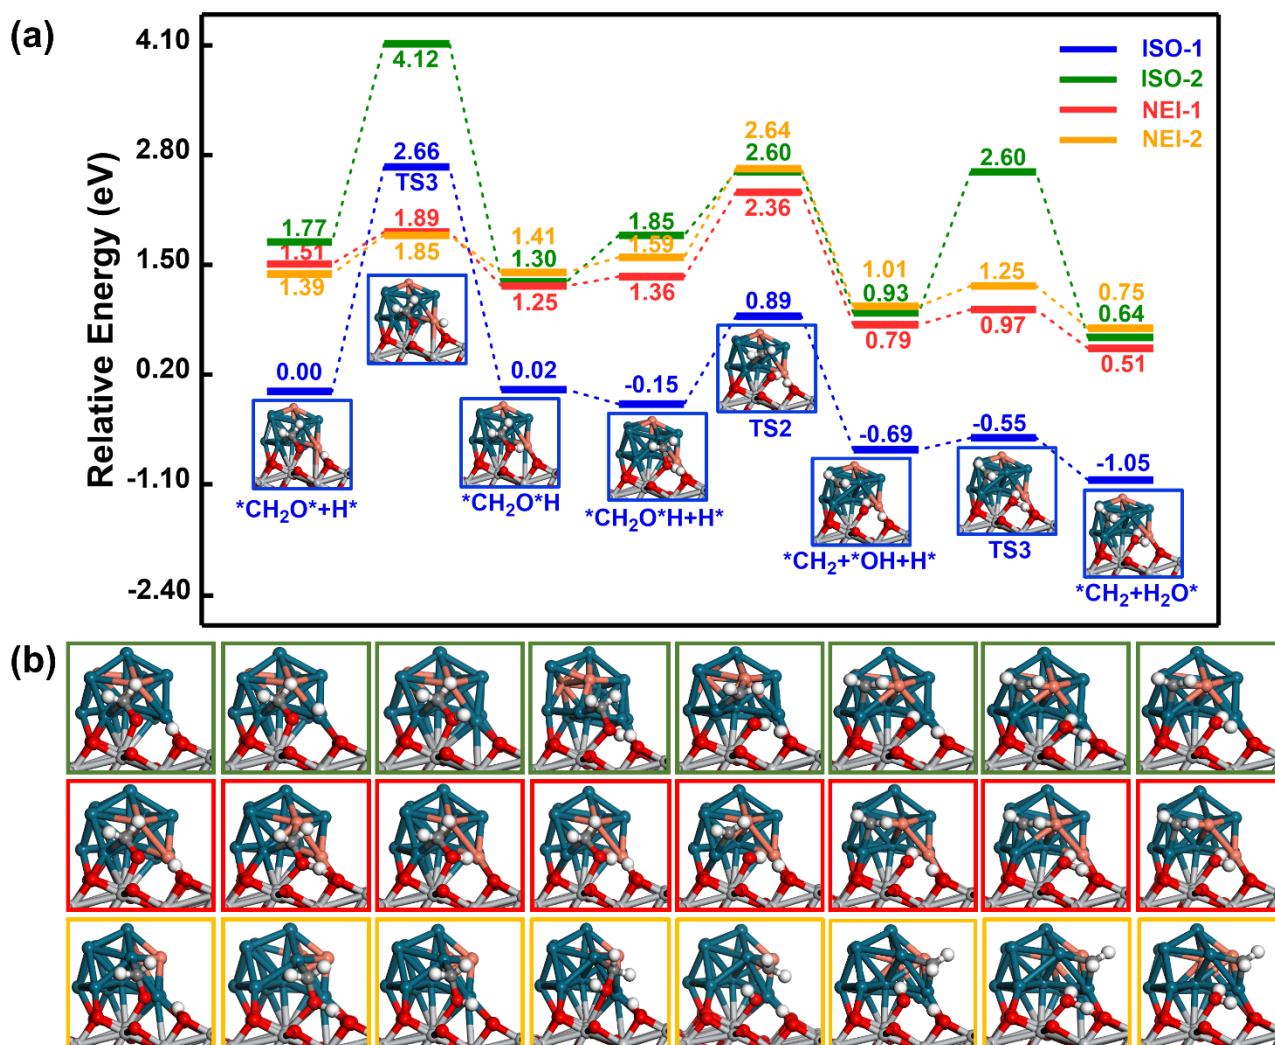

Figure S14. (a) The reaction pathways for  $^*\text{CH}_2\text{O}^*$  to  $^*\text{CH}_2$  related to the four interface models (ISO-1, ISO-2, NEI-1, and NEI-2) of  $\text{Pd}_{11}\text{Cu}_2@\text{TiO}_2$ , in which  $^*\text{CH}_2\text{O}^*$  is hydrogenated to produce  $^*\text{CH}_2\text{O}^*\text{H}$ , followed by the cleavage of the C-O bond. Relevant transition states and intermediates related to these four models are also shown in panels a (ISO-1) and b (ISO-2, NEI-1, and NEI-2). Ti, O, Pd, Cu, C, and H atoms are in gray, red, cyan, orange, dark grey, and white, respectively.



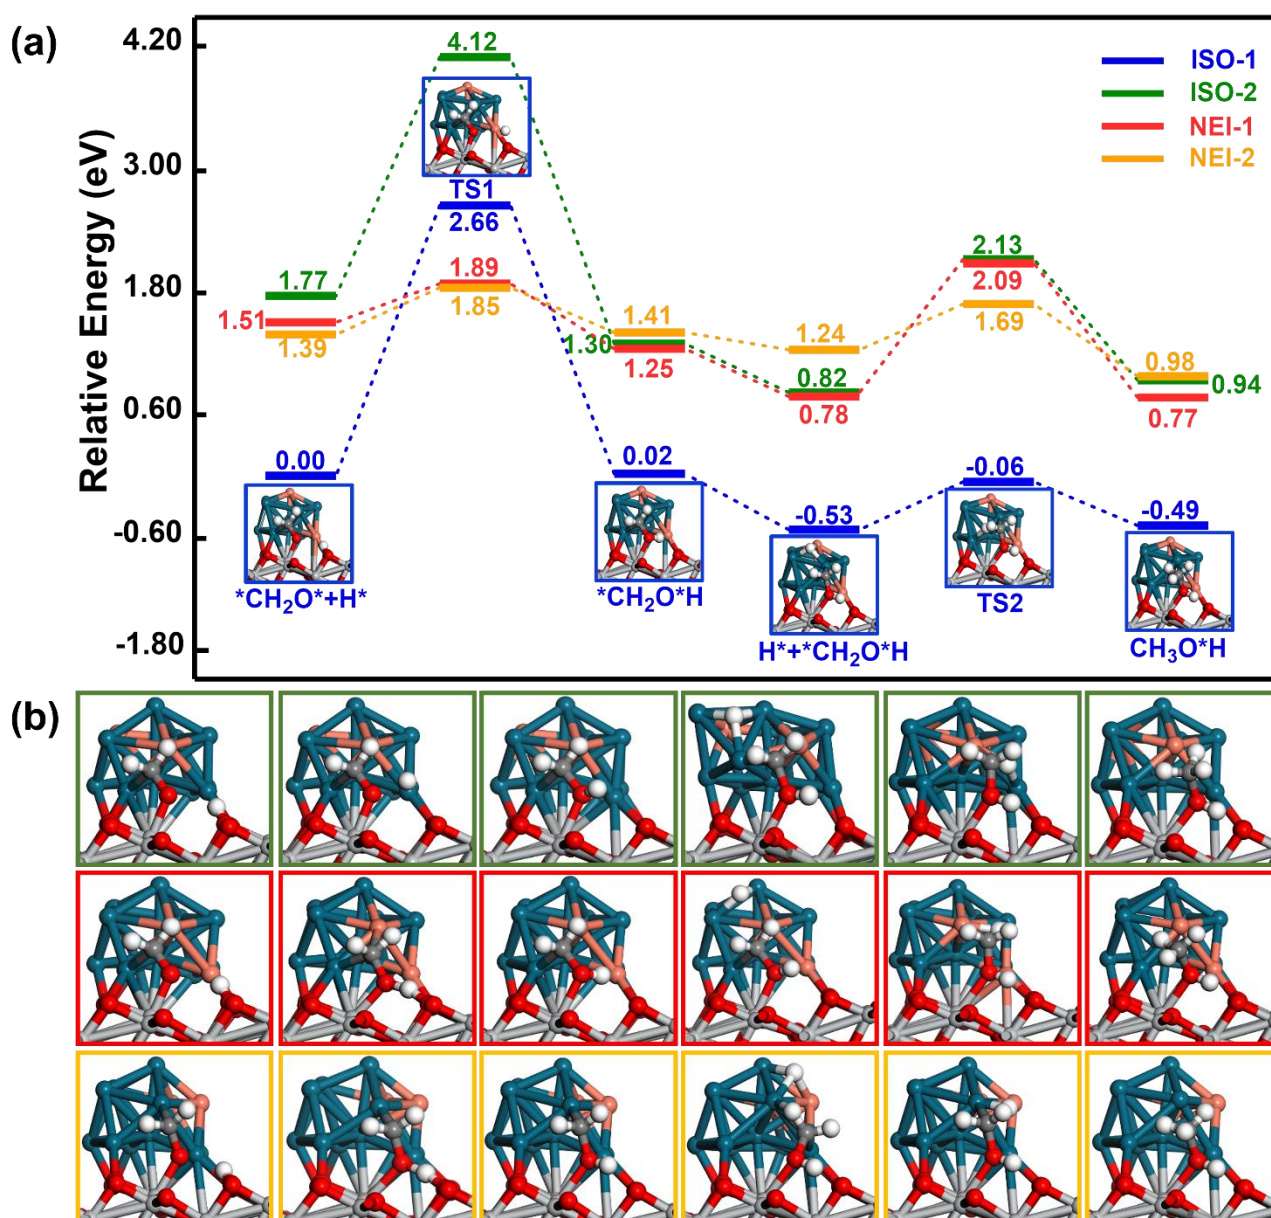

Figure S15. (a) The reaction pathways for  $\text{*CH}_2\text{O*}$  to  $\text{CH}_3\text{O*H}$  related to the four interface models (ISO-1, ISO-2, NEI-1, and NEI-2) of  $\text{Pd}_{11}\text{Cu}_2\text{@TiO}_2$ , in which  $\text{*CH}_2\text{O*}$  is sequentially hydrogenated to produce  $\text{*CH}_2\text{O*H}$  and  $\text{CH}_3\text{O*H}$ . Relevant transition states and intermediates related to these four models are also shown in panels a (ISO-1) and b (ISO-2, NEI-1, and NEI-2). Ti, O, Pd, Cu, C, and H atoms are in gray, red, cyan, orange, dark grey, and white, respectively.



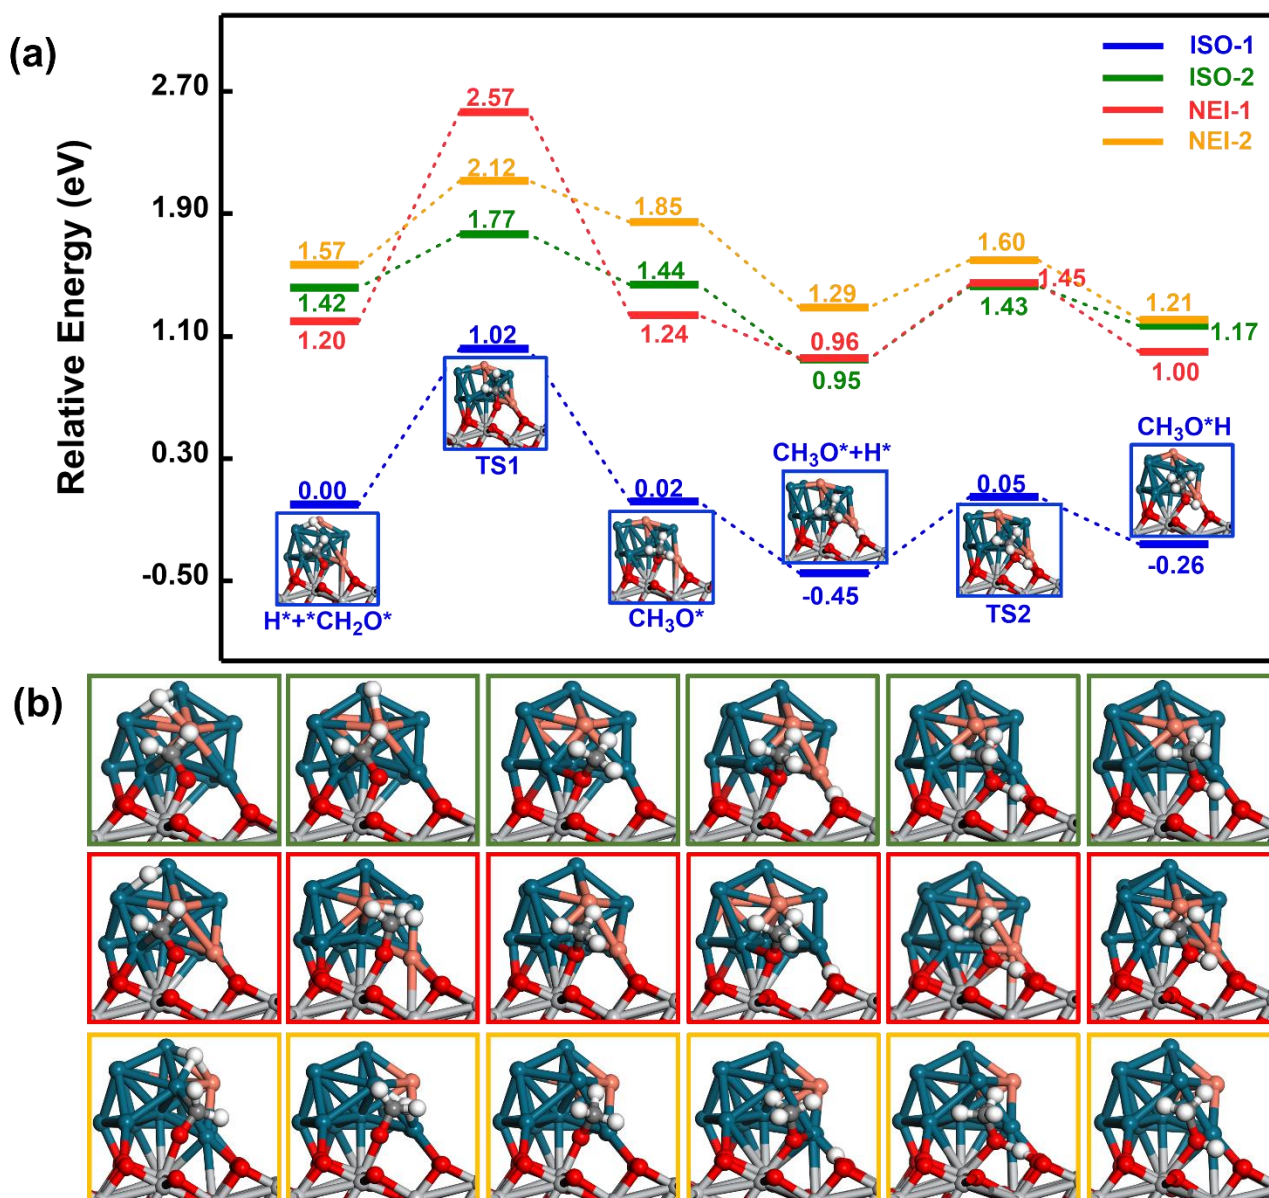

Figure S16. (a) The reaction pathways for  $^*\text{CH}_2\text{O}^*$  to  $\text{CH}_3\text{O}^*\text{H}$  related to the four interface models (ISO-1, ISO-2, NEI-1, and NEI-2) of  $\text{Pd}_{11}\text{Cu}_2@\text{TiO}_2$ , in which  $^*\text{CH}_2\text{O}^*$  is sequentially hydrogenated to produce  $^*\text{CH}_3\text{O}^*$  and  $\text{CH}_3\text{O}^*\text{H}$ . Relevant transition states and intermediates related to these four models are also shown in panels a (ISO-1) and b (ISO-2, NEI-1, and NEI-2). Ti, O, Pd, Cu, C, and H atoms are in gray, red, cyan, orange, dark grey, and white, respectively.

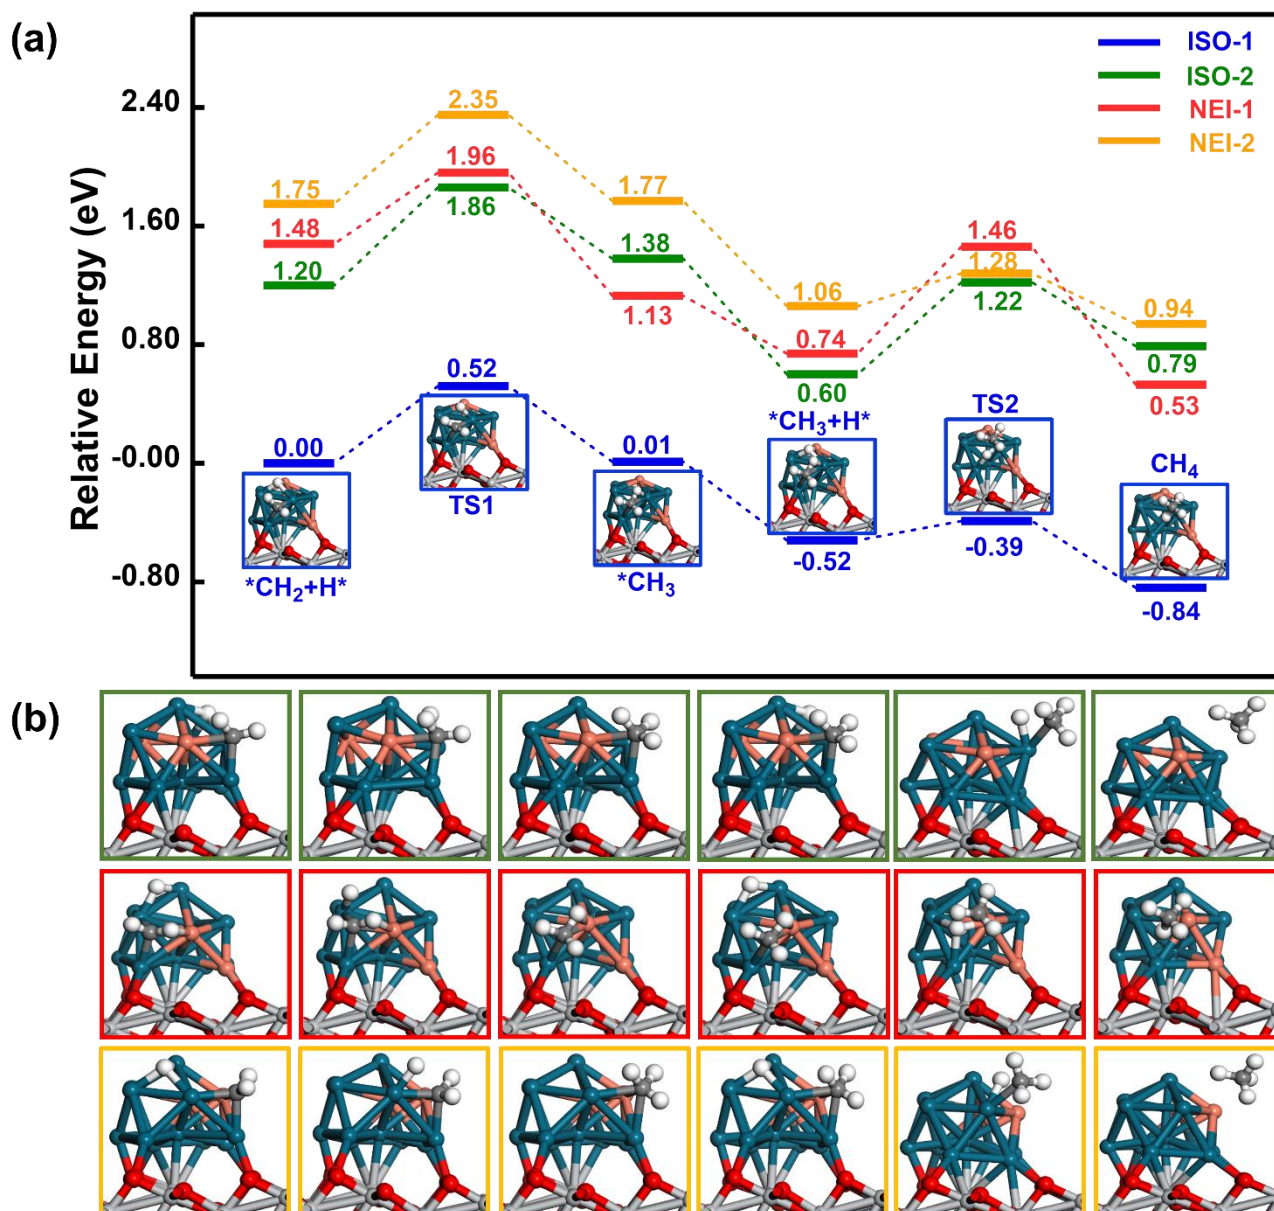

Figure S17. (a) The reaction pathways for  $^*\text{CH}_2$  to  $\text{CH}_4$  related to the four interface models (ISO-1, ISO-2, NEI-1, and NEI-2) of  $\text{Pd}_{11}\text{Cu}_2@ \text{TiO}_2$ . Relevant transition states and intermediates related to these four models are also shown in panels a (ISO-1) and b (ISO-2, NEI-1, and NEI-2). Ti, O, Pd, Cu, C, and H atoms are in gray, red, cyan, orange, dark grey, and white, respectively.

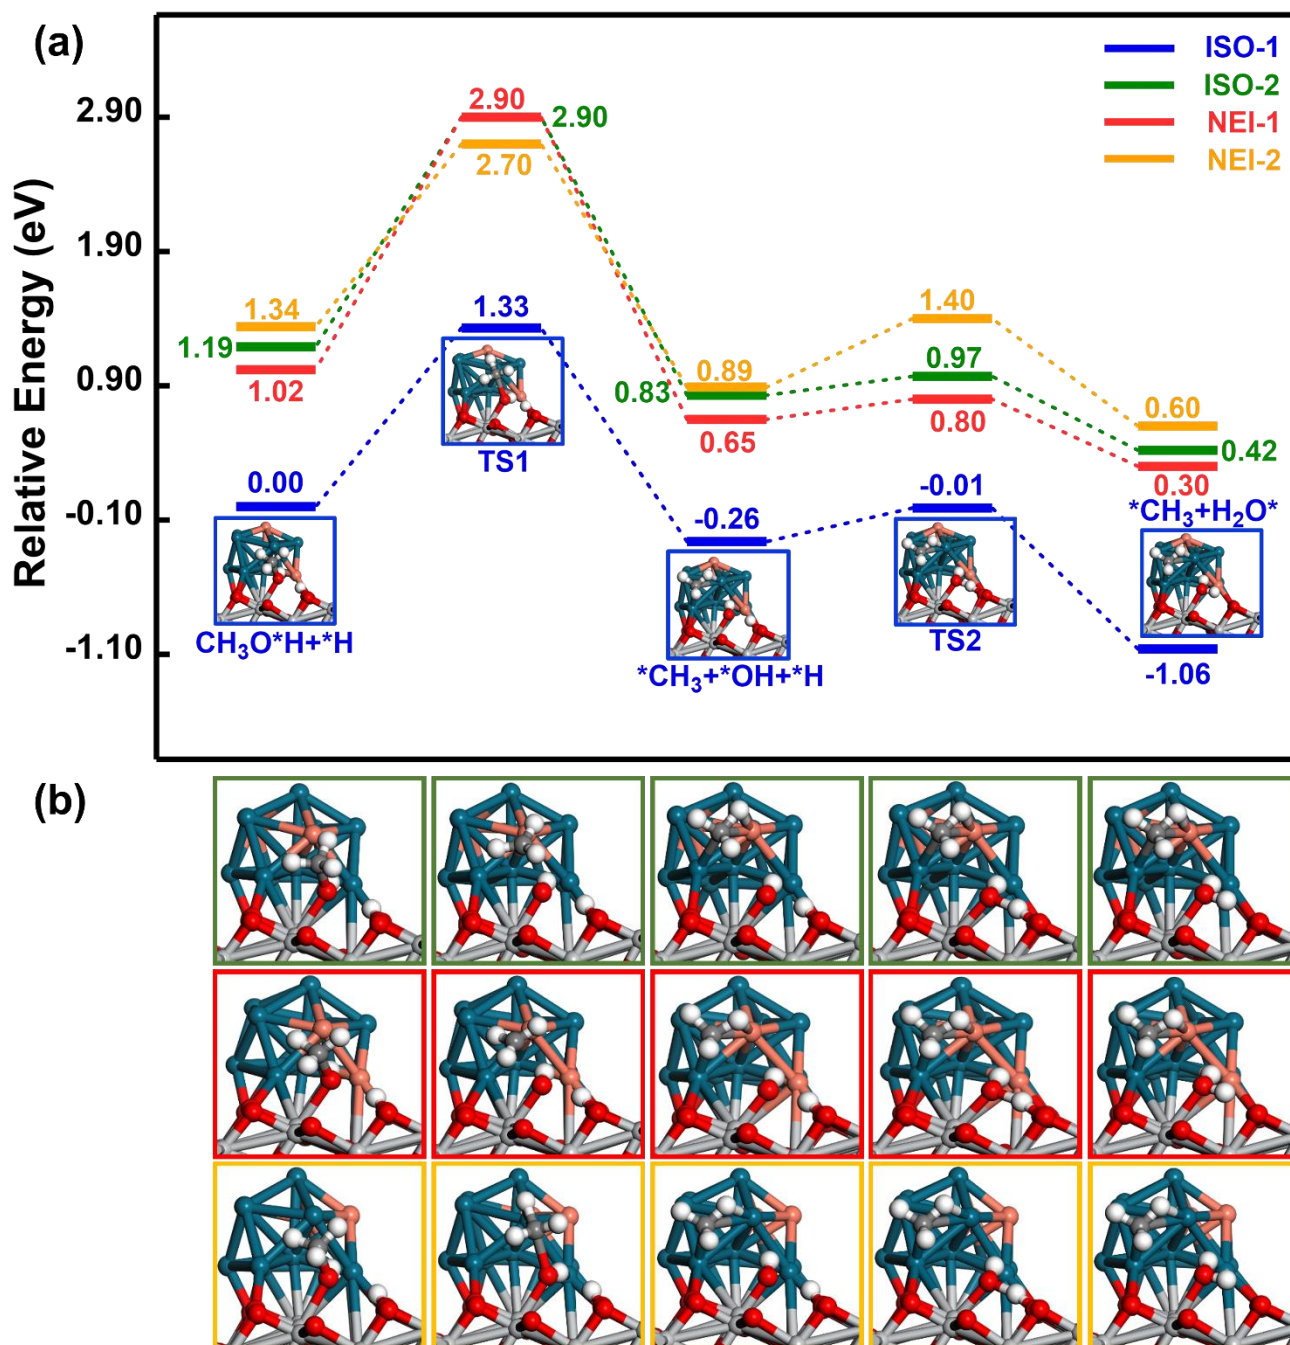

Figure S18. (a) The reaction pathways for  $\text{CH}_3\text{O}^*\text{H}$  to  $^*\text{CH}_3$  related to the four interface models (ISO-1, ISO-2, NEI-1, and NEI-2) of  $\text{Pd}_{11}\text{Cu}_2@ \text{TiO}_2$ . Relevant transition states and intermediates related to these four models are also shown in panels a (ISO-1) and b (ISO-2, NEI-1, and NEI-2). Ti, O, Pd, Cu, C, and H atoms are in gray, red, cyan, orange, dark grey, and white, respectively.



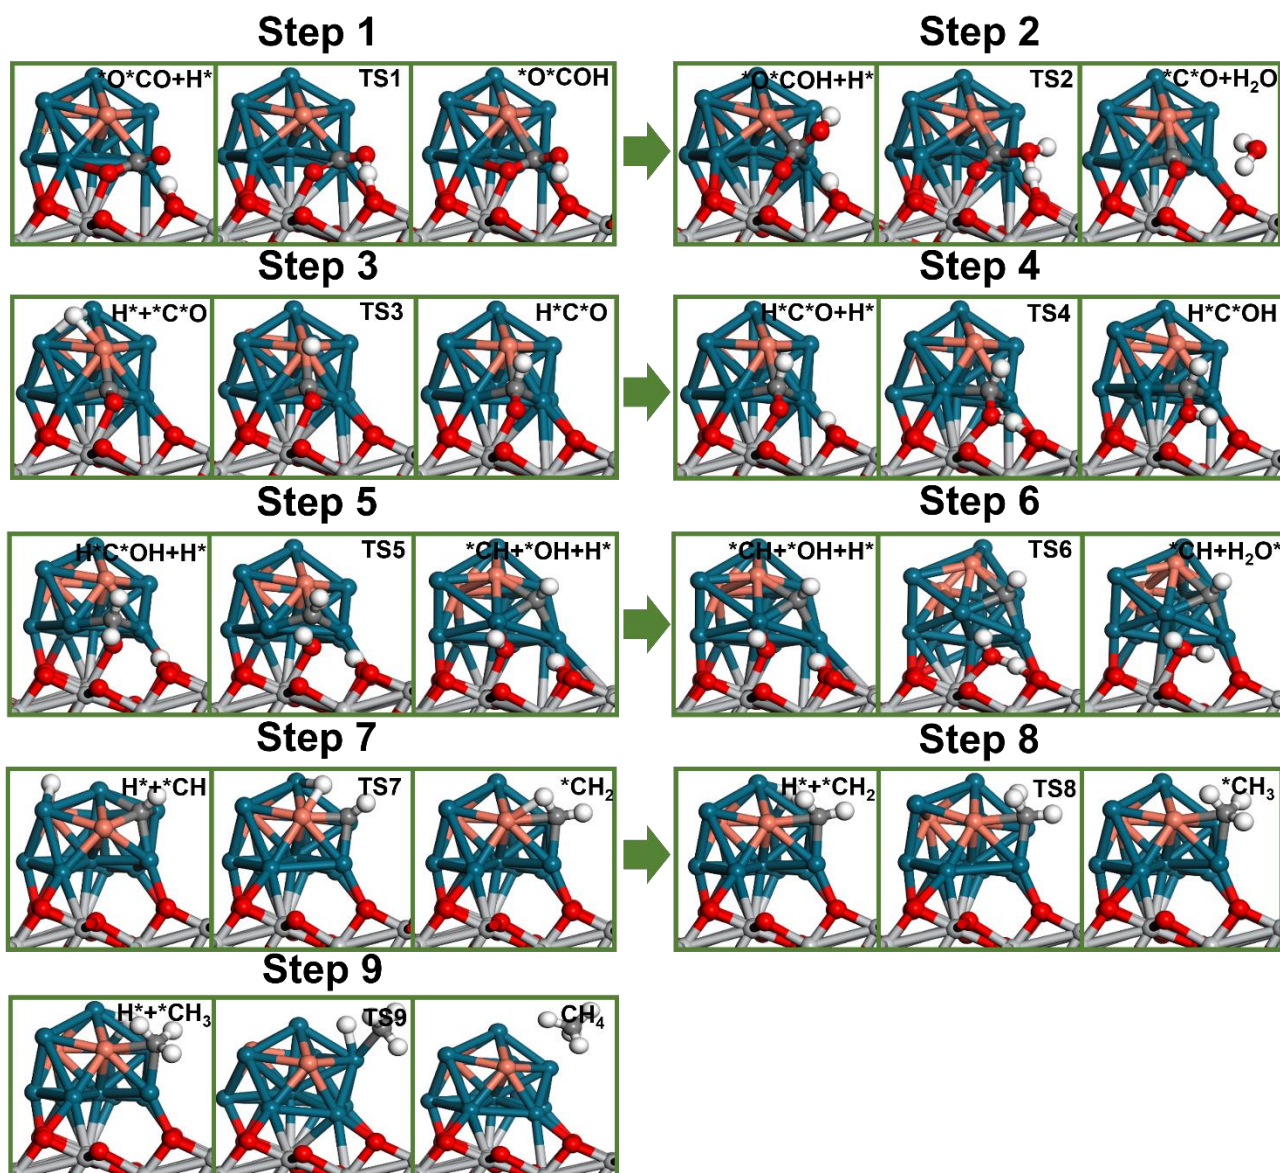

Figure S19. The transition states and intermediates along the most efficient pathway for the  $\text{CH}_4$  formation related to the ISO-2 model of  $\text{Pd}_{11}\text{Cu}_2@ \text{TiO}_2$ .



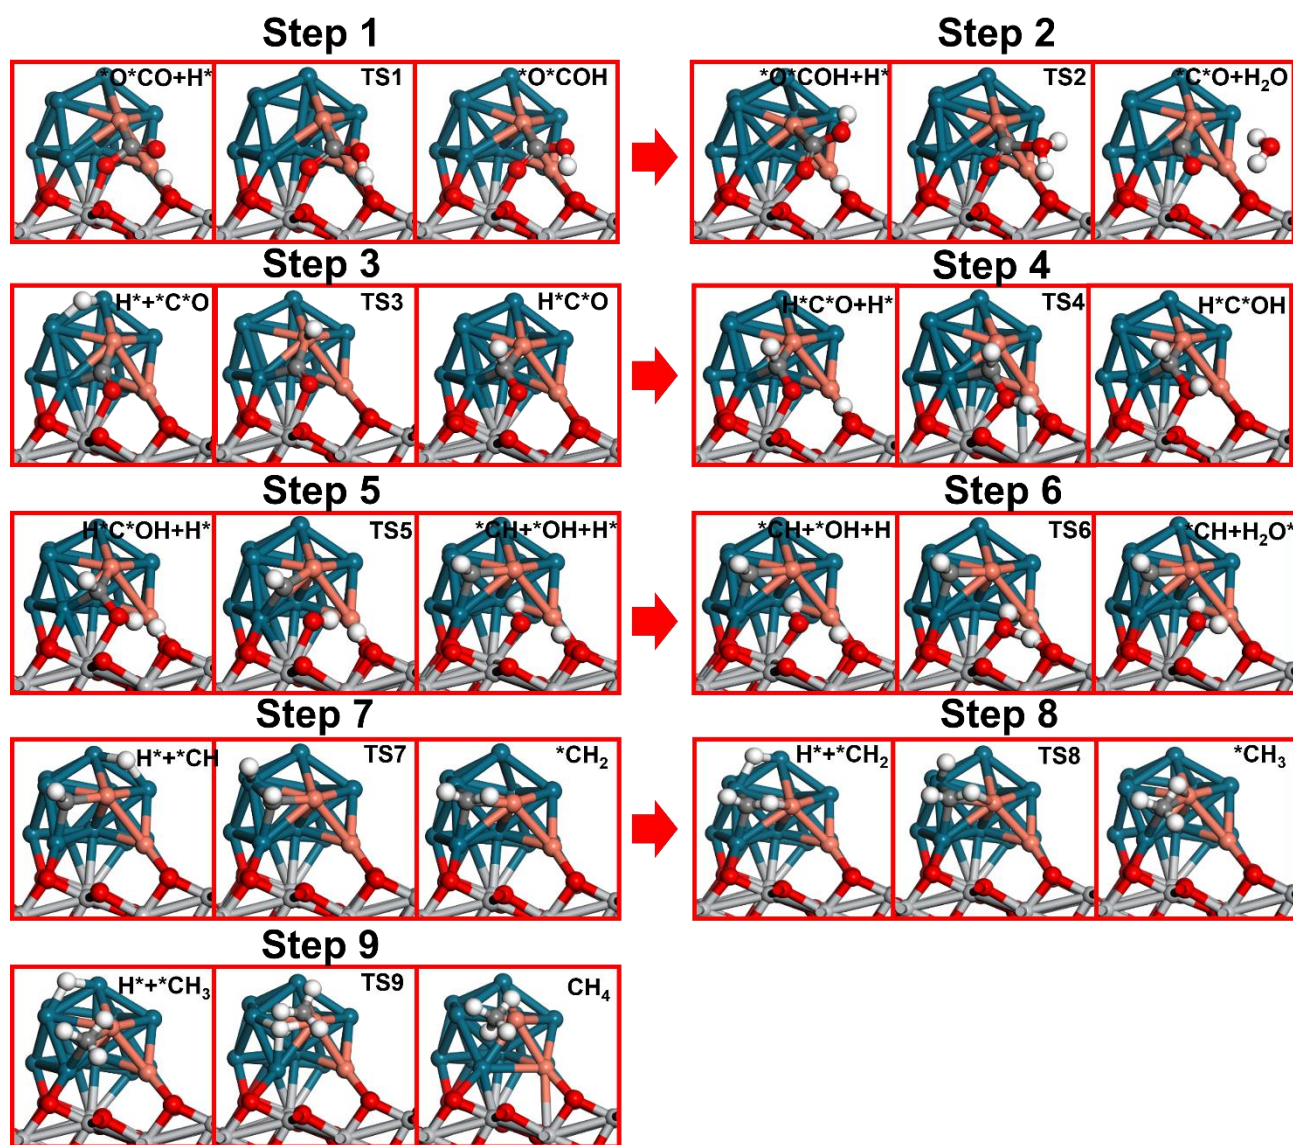

Figure S20. The transition states and intermediates along the most efficient pathway for the  $\text{CH}_4$  formation related to the NEI-1 model of  $\text{Pd}_{11}\text{Cu}_2@\text{TiO}_2$ .

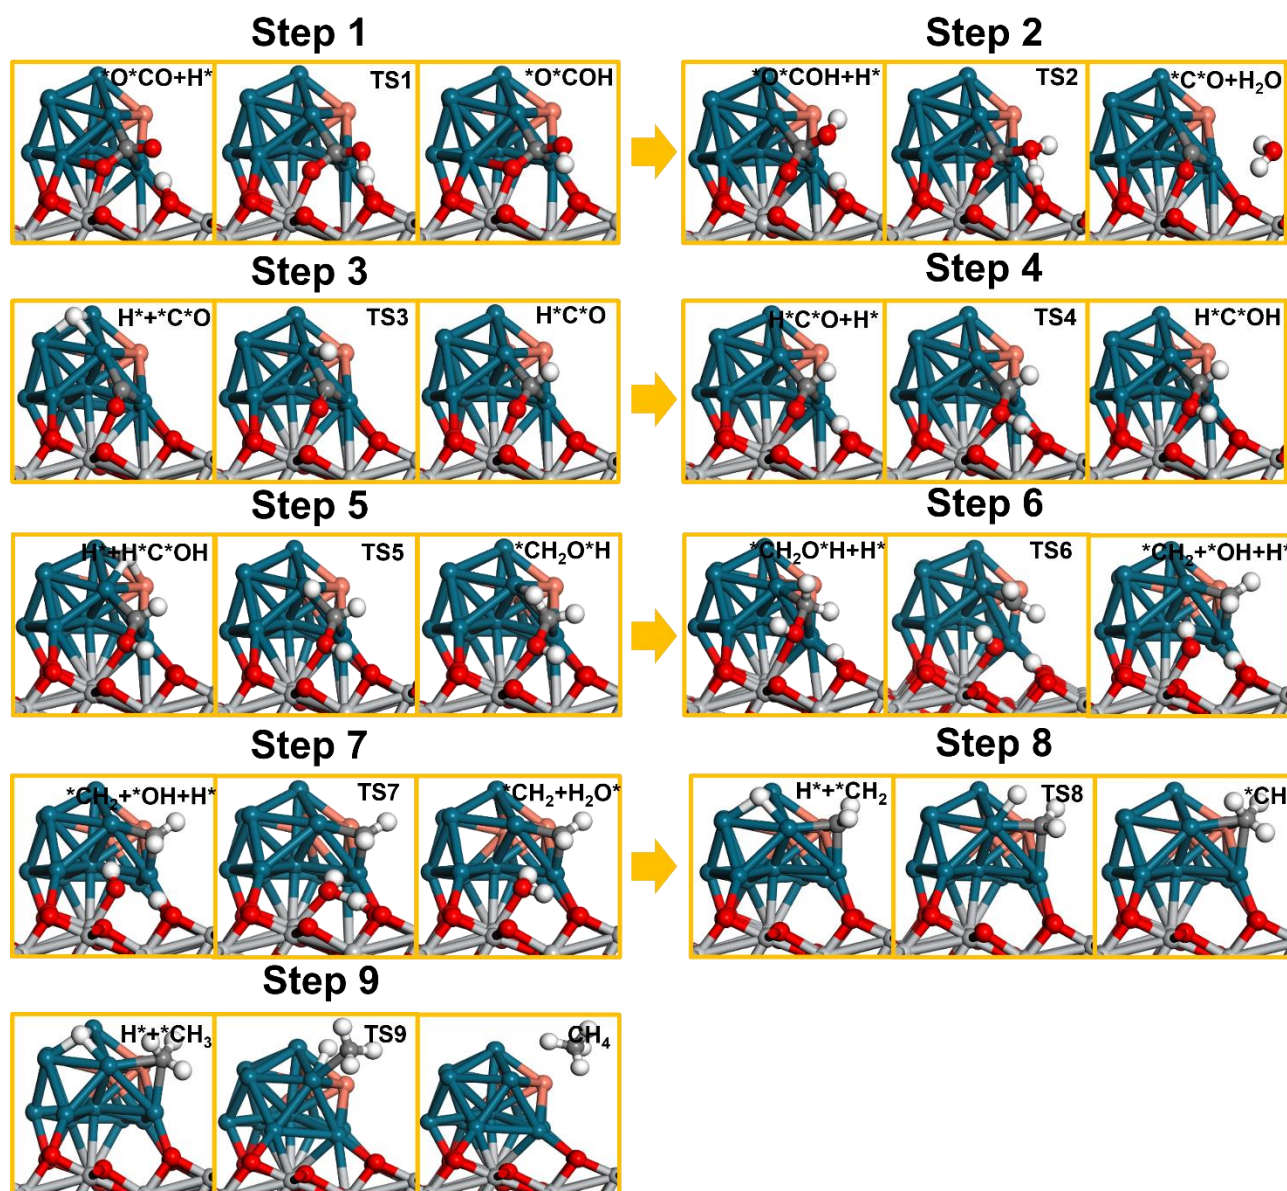

Figure S21. The transition states and intermediates along the most efficient pathway for the  $\text{CH}_4$  formation related to the NEI-2 model of  $\text{Pd}_{11}\text{Cu}_2@\text{TiO}_2$ .



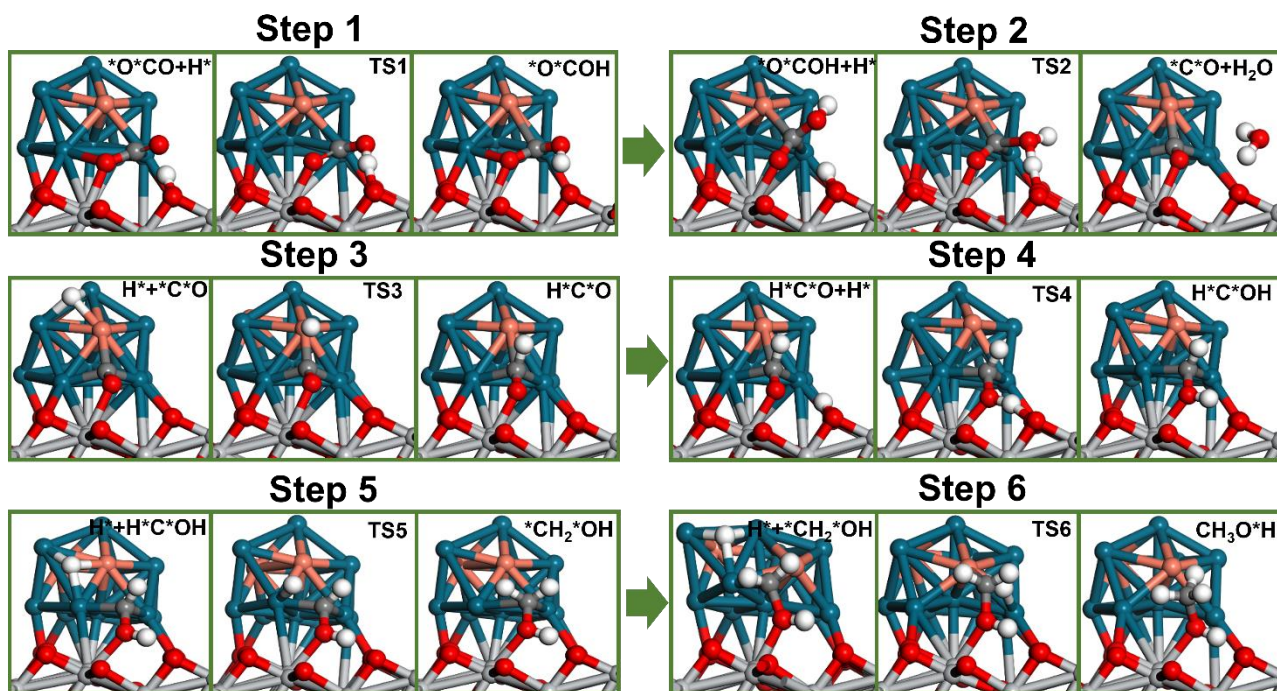

Figure S22. The transition states and intermediates along the most efficient pathway for the  $\text{CH}_3\text{OH}$  formation related to the ISO-2 model of  $\text{Pd}_{11}\text{Cu}_2@\text{TiO}_2$ .

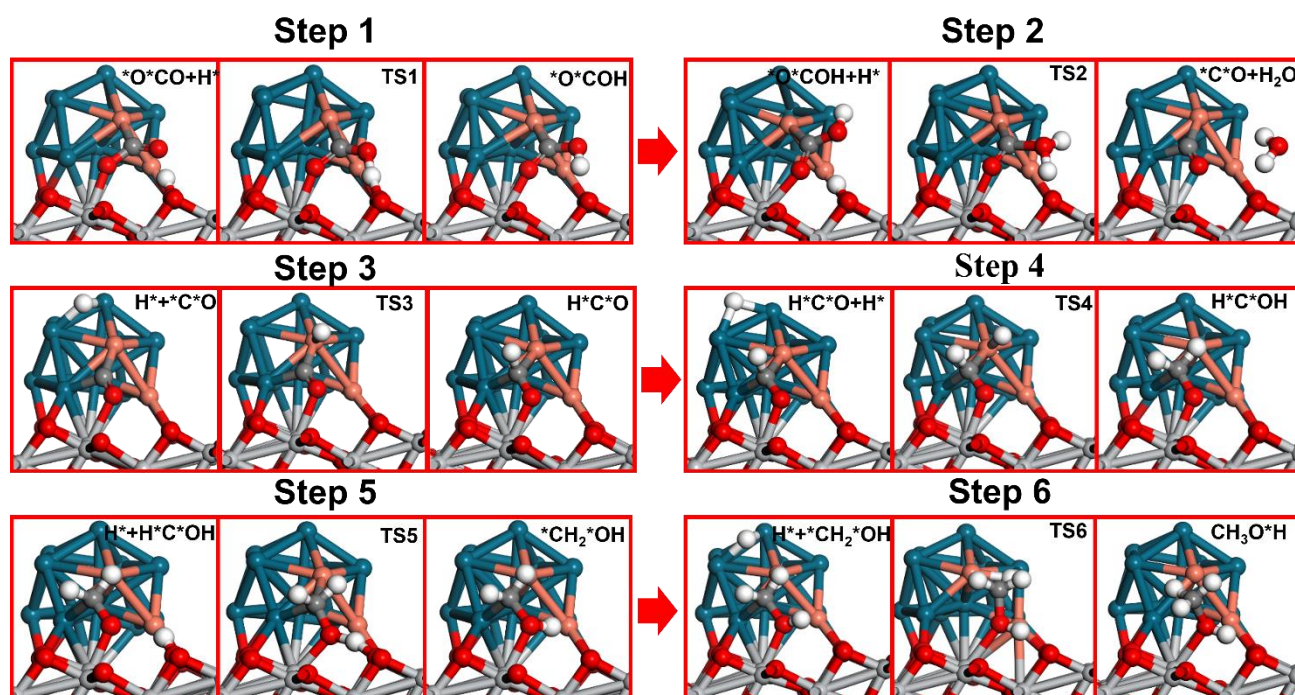

Figure S23. The transition states and intermediates along the most efficient pathway for the  $\text{CH}_3\text{OH}$  formation related to the NEI-1 model of  $\text{Pd}_{11}\text{Cu}_2@\text{TiO}_2$ .



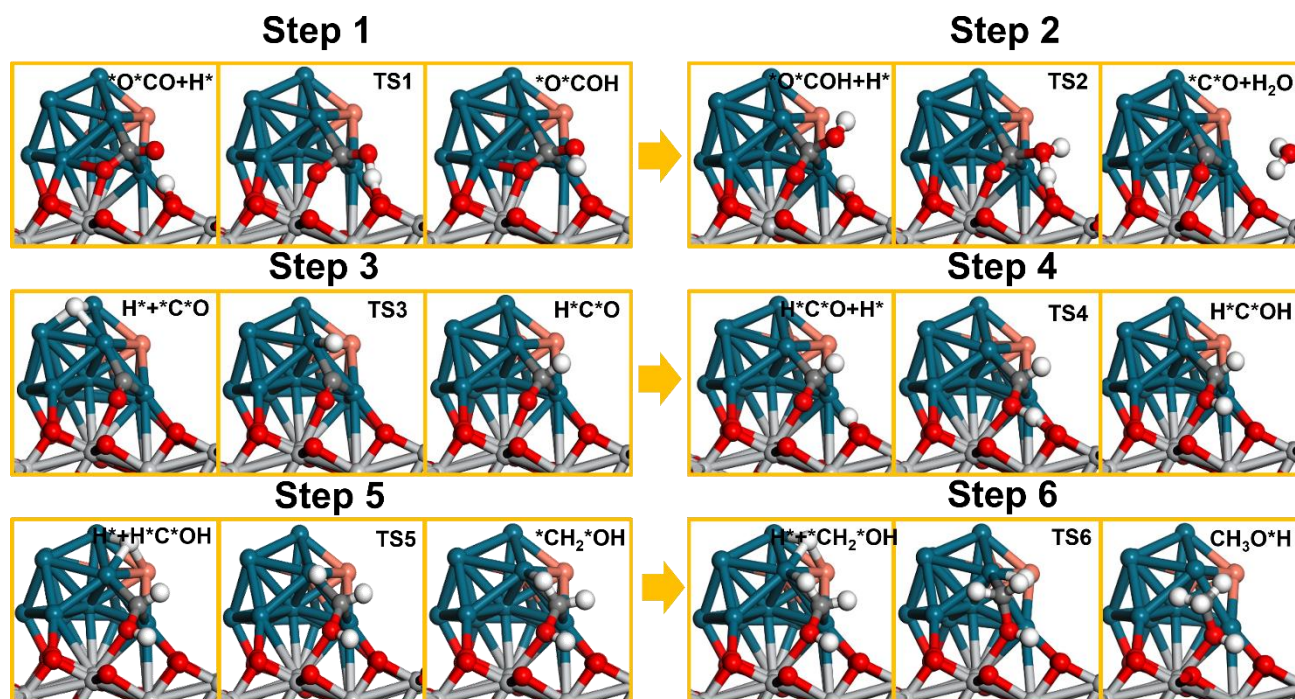

Figure S24. The transition states and intermediates along the most efficient pathway for the  $\text{CH}_3\text{OH}$  formation related to the NEI-2 model of  $\text{Pd}_{11}\text{Cu}_2@\text{TiO}_2$ .

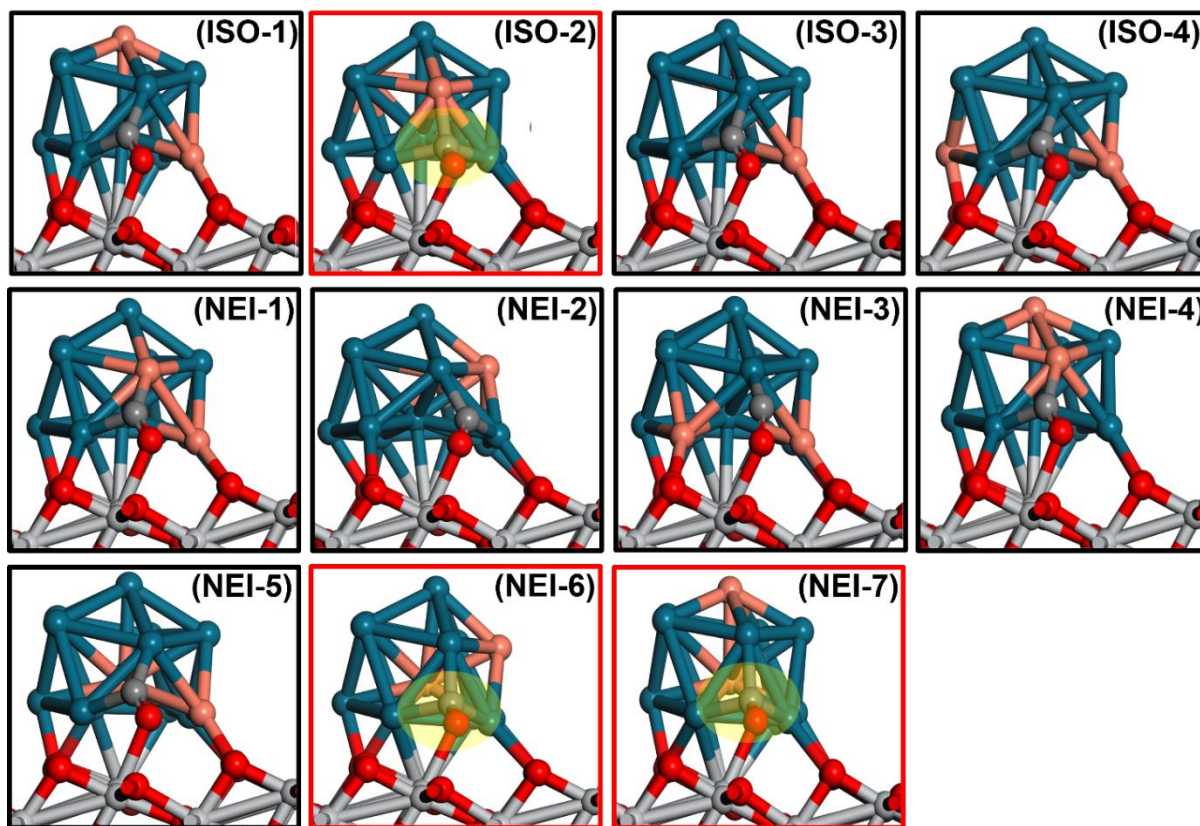

Figure S25. The  $\text{*C*O}$  adsorbed configurations related to the eleven models of  $\text{Pd}_{11}\text{Cu}_2@\text{TiO}_2$  (ISO-1 to ISO-4, and NEI-1 to NEI-7). The  $\text{*C*O}$  structures in a valence-bond saturated state are highlighted.





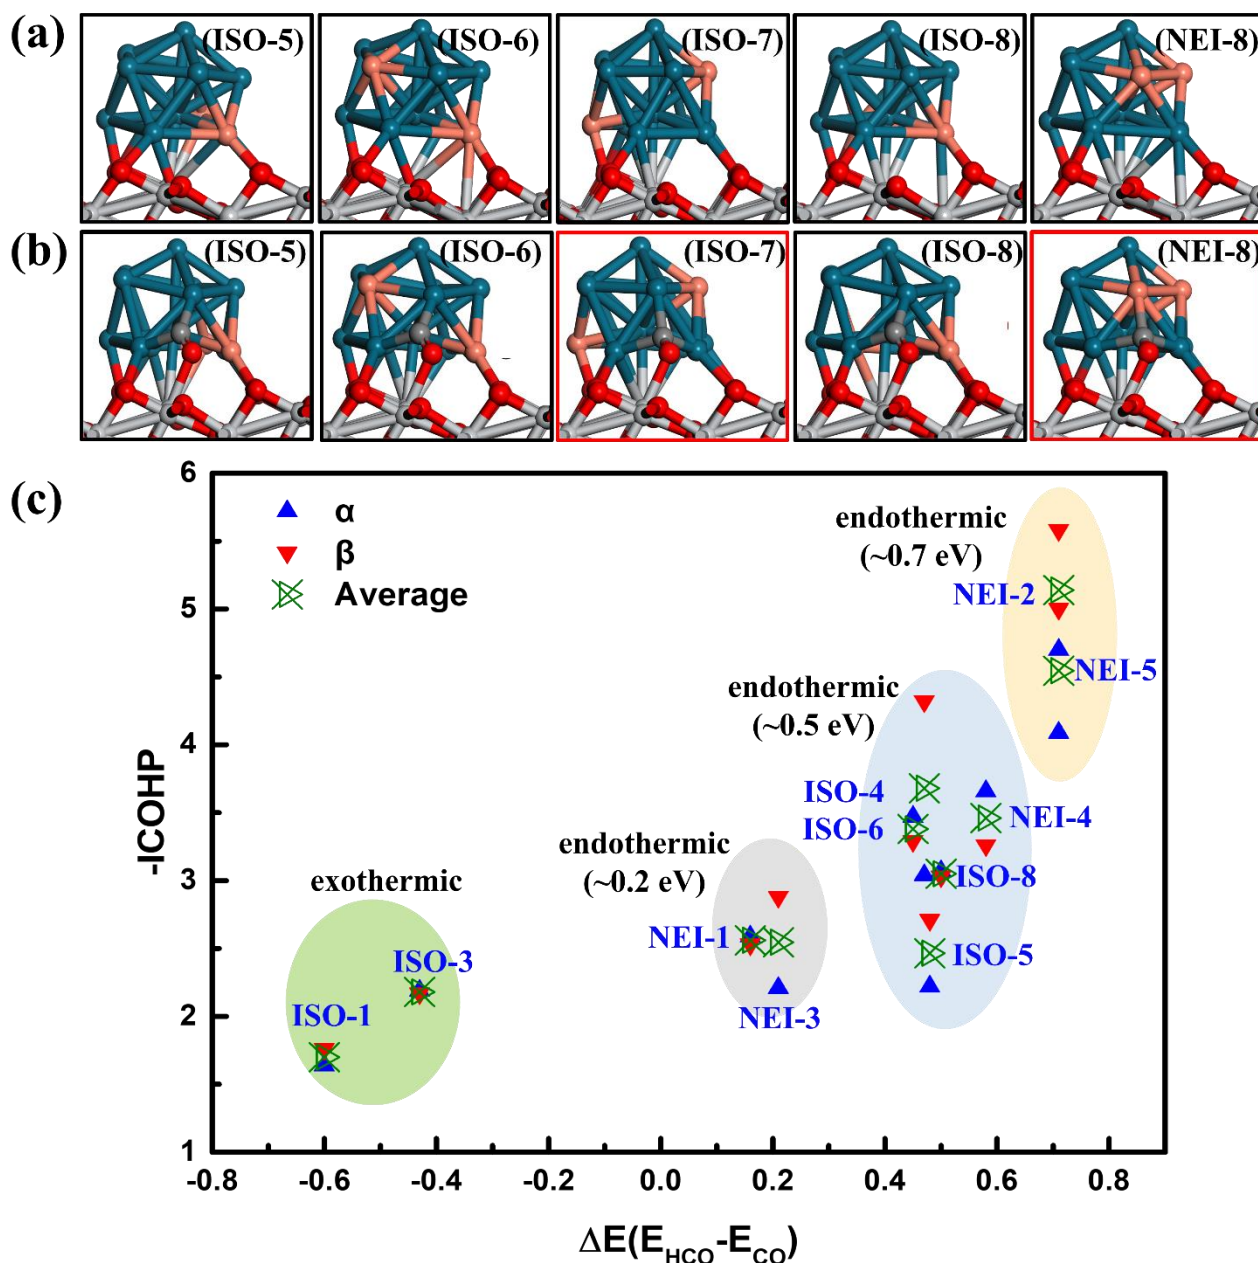

Figure S27. Five additional computational models developed for verification the reliability of the conclusions.

# Section I: Microkinetic Simulation Details

The net rate for elementary step  $i$  in term of the forward rate constant,  $k_i$ , the coverage of reactant on two different sites,  $\theta(j)$ , and the reversibility,  $Z_i$ , can be written as<sup>1</sup>

$$r_i = k_i \prod_j \theta(j)^{v_{ij}} (1 - Z_i) \quad [1]$$

where  $Z_i = \frac{Q_i}{K_{i,eq}}$ , which approaches 0 as step  $i$  becomes irreversible and approaches 1 as step  $i$

becomes quasi-equilibrated.  $K_{i,eq}$  is the equilibrium constant of step  $i$ , determined by the standard

Gibbs free energy change ( $-\Delta G_i$ ) of the elementary reaction,  $K_{eq,i} = \exp(-\frac{\Delta G_i}{RT})$ .  $Q_i = \frac{C_{1-} C_{2-} \theta_{1-} \theta_{2-}}{C_{1+} C_{2+} \theta_{1+} \theta_{2+}}$

is the reaction quotient of step  $i$ . The rate constant,  $k_i$ , for the elementary step can be determined by the transition state theory:

$$k_i = \frac{k_B T}{h} \exp(-\frac{\Delta G_i}{RT}) = \frac{k_B T}{h} \exp(\frac{\Delta S}{R}) \exp(-\frac{E_a}{RT}) \approx \frac{k_B T}{h} \exp(-\frac{E_a}{RT}) \quad [2]$$

where  $k_B$  and  $h$  are the Boltzmann and Planck constants, respectively. The standard equilibrium constant  $K_{eq,i}$  and rate constant  $k_i$  can be calculated with DFT data including entropy and zero-point energy effects. Under the steady-state approximation, we can solve a set of kinetic equations with the condition that the coverages on each adsorption site are equal to 1.

To evaluate the relative significance of each elementary step in influencing the overall catalytic activity, the "degree of rate control" ( $X_{RC,i}$ ) is utilized<sup>2-3</sup>. This technique provides a quantitative assessment of the sensitivity of each step within the comprehensive reaction framework.  $X_{RC,i}$  for step  $i$  can be expressed in term of the standard Gibbs free energy of the transition state as

$$X_{RC,i} = \frac{k_i}{r} \left( \frac{\partial r}{\partial k_i} \right)_{j \neq i, K_{eq,i}} = \left( \frac{\partial \ln r}{\partial \ln k_i} \right)_{j \neq i, K_{eq,i}} \quad [3]$$

The value of  $X_{RC,i}$  for step  $i$  is larger, the influence of this step on the overall reaction rate is bigger.

Here we used the collision theory to handle the kinetics of molecular adsorption process and to derive the equivalent barriers ( $E_a$ ). According to the transition state and collision theories, the reaction rate on a per-site basis can be written as:

$$r_+(T) = \frac{k_B T}{h} \exp\left(-\frac{E_a}{k_B T}\right) \frac{P_i}{P^0} \approx S_i(T) \frac{P_i A_0}{\sqrt{2\pi k_B m_i T}} \quad [4]$$

where  $k_B$ ,  $h$ ,  $T$ ,  $P_i$  and  $m_i$  are the Boltzmann constant, Planck constant, reaction temperature, pressure, and mass of gas molecule, respectively.  $A_0$  is the area of the atom which is described as  $A_0 = \pi^* r^2$ , in which  $r$  is the VDW radius of the atom. Herein, we have assumed that the gas molecule behaves ideally,  $S_i(T)$ , the sticking coefficient, is seen as 1. Hence, we could get an equation about  $E_a$ :

$$E_a \approx -k_B T \ln\left(\frac{P^0 A_0 h}{k_B T \sqrt{2\pi k_B m_i T}}\right) \quad [5]$$

In the present microkinetic simulation, we followed the experimental condition<sup>4</sup>, 2 atm CO<sub>2</sub>, 6\*10<sup>-5</sup> atm CH<sub>4</sub>, 5.7\*10<sup>-6</sup> atm CO, 4.5\*10<sup>-6</sup> atm H<sub>2</sub>, and T = 300 K. Also, the concentration of liquid H<sub>2</sub>O was set as 55.6 mol/L (pure water), and the concentration of liquid products HCOOH and CH<sub>3</sub>OH were assumed to be 1 and 1 mol/L. C<sub>h</sub><sup>+</sup> and C<sub>e</sub><sup>-</sup> are set as 10<sup>-9</sup> mol/L<sup>5-6</sup>.



## Section II: Water Photolysis

To account for the microkinetic simulation requirements of intermediates of  $H^+$  and  $H$ , we also explored the photocatalytic  $H_2O$  splitting, including water oxidation to produce  $O_2$  and water reduction to generate  $H_2$ , which is considered one of the major competitors to the  $CO_2$  reduction.

In the first step, water dissociates to form  $OH^-/H^+$ , or  $OH^-/H$  ( $H^+$  withdrawing an  $e^-$  from  $Pd_{11}Cu_2$ ). The production of  $H^+$  or  $H$  depends on the adsorption site of the dissociated  $H$  species. If it is adsorbed on  $O_{2b}$ ,  $H^+$  is formed (as shown by path I in Figure S28); if it is adsorbed on the  $Pd_{11}Cu_2$  cluster, an  $H$  atom is formed (as indicated by path II in Figure S28). From a thermodynamic standpoint, the two product formation pathways are competitive, as both are endothermic by ca. 0.2 eV. However, the pathway for  $H^+$  is more favorable due to its lower energy barrier (0.70 eV compared to 1.00 eV for  $H$ ). According to our calculations, the first step of water dissociation involving holes is non-competitive, as it requires an endothermic energy input of 0.76 eV, similar to the previously reported dissociation of water on the  $TiO_2$  surface<sup>5-7</sup>.

The two adsorption configurations of  $OH^-$  produced in the first step undergo a subsequent  $H$  dissociation step. Similar to the initial step, depending on the adsorption structure of  $OH^-$ , the dissociated  $H$  may be adsorbed on  $O_{2b}$ , resulting in  $H^+$ , or onto the  $Pd_{11}Cu_2$  cluster, leading to  $H$ . A key question remains whether holes are involved in this dissociation process. If  $OH^-$  dissociation occurs without the involvement of a hole, and the dissociated  $H$  atom is adsorbed on the  $Pd_{11}Cu_2$  cluster, the reaction must overcome an energy barrier of 1.36 eV and absorb 0.47 eV energy to form the  $O^-$  intermediate (as shown by path I in Figure S29). Alternatively, if the dissociated  $H^+$  is adsorbed on the  $O_{2b}$  site, the process requires an energy barrier of 0.99 eV and the energy absorption of 0.08 eV, resulting in the formation of the  $O^{2-}$  intermediate (path II in Figure S29). If a hole participates in the reaction, transferring the hole from the bulk to  $OH^-$  producing  $OH$  is endothermic, requiring ca. 0.2 eV (Figure S30) and an associated energy barrier of around 0.5 eV<sup>8</sup>. Based on this  $OH$ , when  $H^+$  is adsorbed on the  $O_b$  site, forming  $O^-/H^+$ , the dissociation process needs to overcome an energy barrier of 0.33 eV and releases 0.10 eV energy. In contrast, for the formation of  $O/H$  with  $H$  adsorbed on the  $Pd_{11}Cu_2$  cluster, the process requires overcoming a higher barrier of 0.89 eV and releases 0.17 eV energy (Figure S31). Comparatively, the involvement of a hole in the second step of the  $H_2O$

dissociation is more favorable for facilitating the reaction. Subsequently,  $\text{O}^-$  can react with a hole to form  $\text{O}$  (Figure S32), and then two  $\text{O}$  atoms form  $\text{O}_2$  (Figure S33). To identify the generated radicals, we analyze their geometric structures, spin densities, Bader charge and magnetic moments. The corresponding data are provided in Table S6 and Figure S29-33.

The  $\text{H}$  and  $\text{H}^+$  produced from water dissociation can couple to form  $\text{H}_2$ . The formation of  $\text{H}_2$  from  $\text{H}^+$  is a major competing pathway in the  $\text{CO}_2$  reduction. However, as shown in Figure S34, the  $\text{H}^+$  reduction does not offer a competitive advantage over the  $\text{CO}_2$  reduction, due to a high energy barrier of 2.24 eV for the  $\text{H}^+$  reduction.

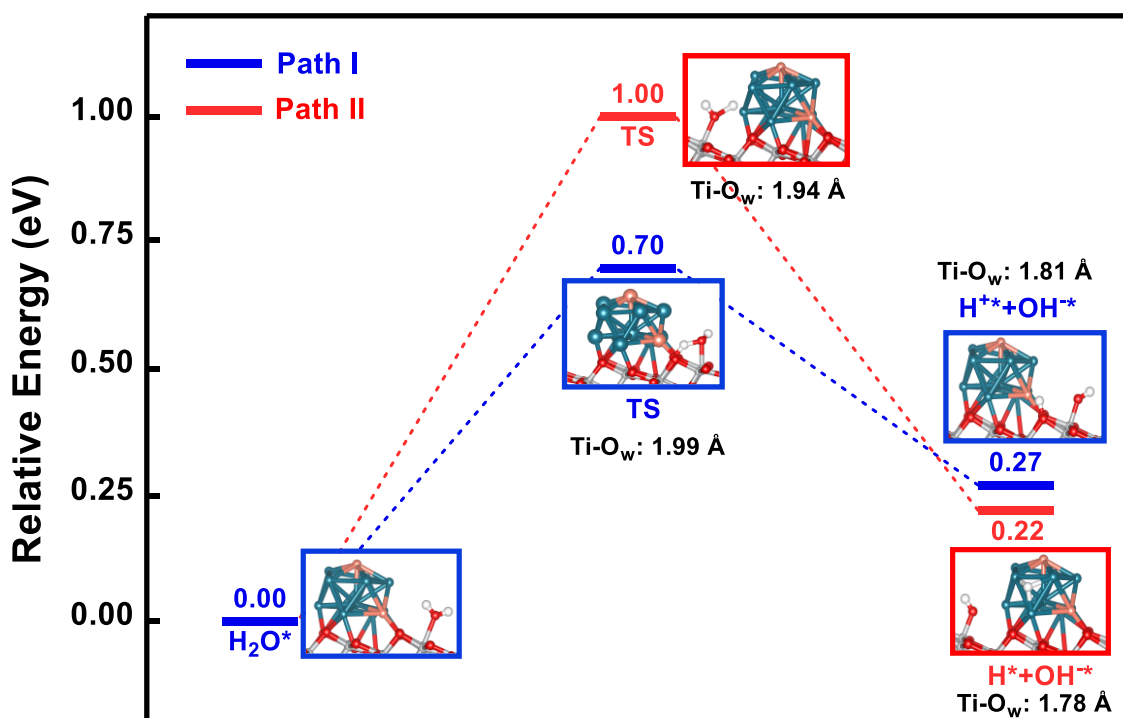

Figure S28. The reaction pathways for water dissociation yielding  $\text{OH}^-/\text{H}$  (path I) and  $\text{OH}^-/\text{H}^+$  (path II) without hole involvement.

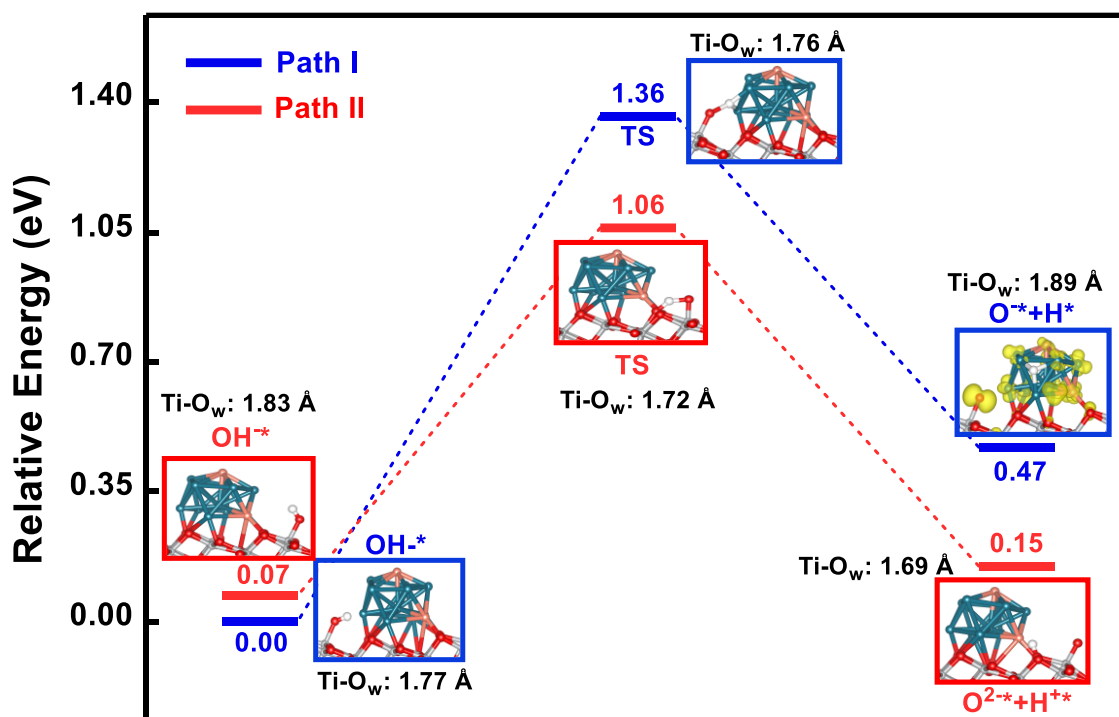

Figure S29. The reaction pathways for  $\text{OH}^-$  dissociation yielding  $\text{O}^-/\text{H}$  (path I) and  $\text{O}^{2-}/\text{H}^+$  (path II) without hole involvement.

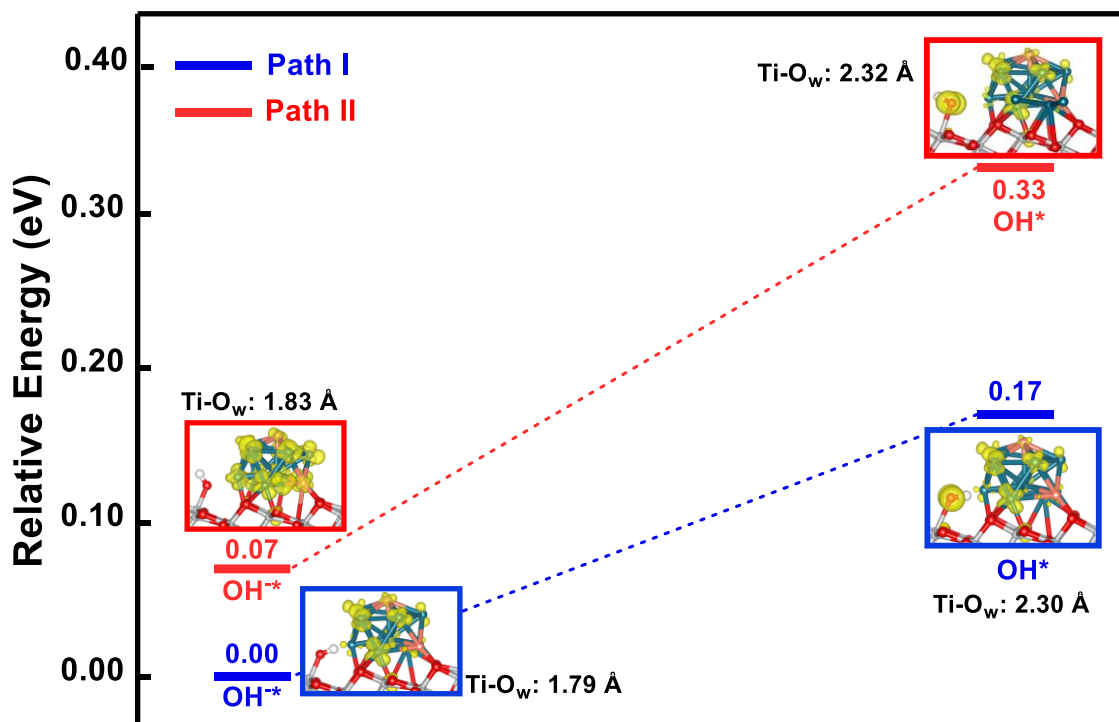

Figure S30. The process in which  $\text{OH}^-$  combines with a hole to form  $\text{OH}$  is endothermic ( $\sim 0.2$  eV), and the hole transfer barrier is taken from the literature<sup>8</sup>.

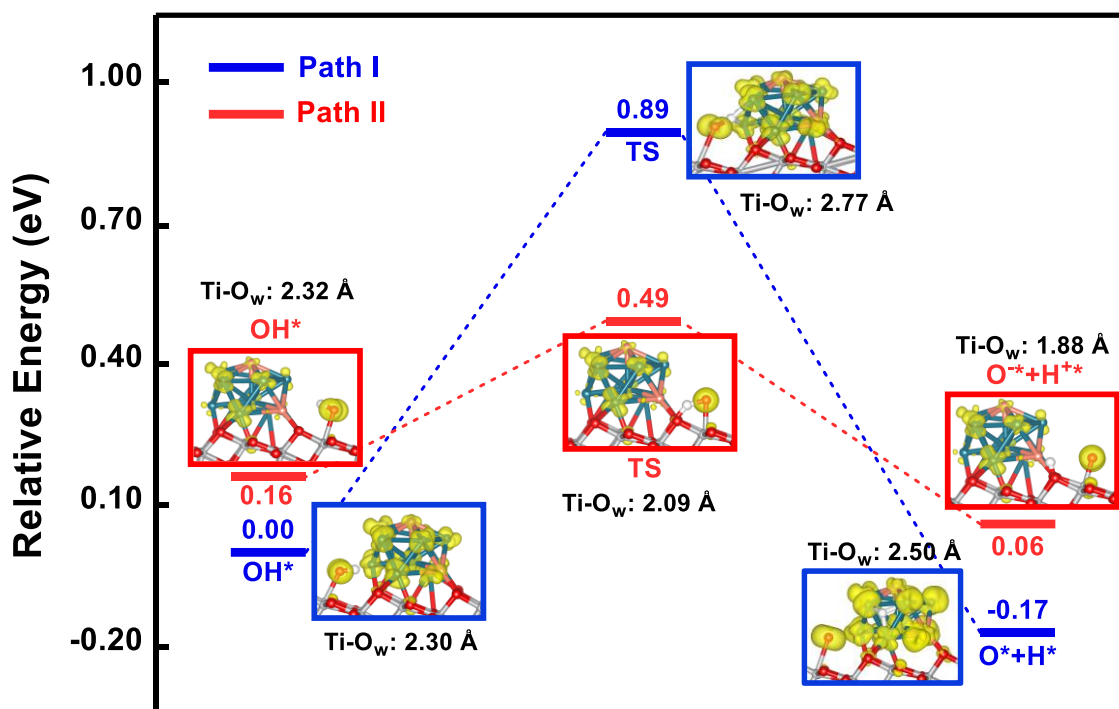

Figure S31. The reaction pathways for OH dissociation yielding O/H (path I) and O<sup>-</sup>/H<sup>+</sup> (path II) with hole involvement. Reactions involving hole are more favorable both kinetically and thermodynamically compared to those without hole involvement.

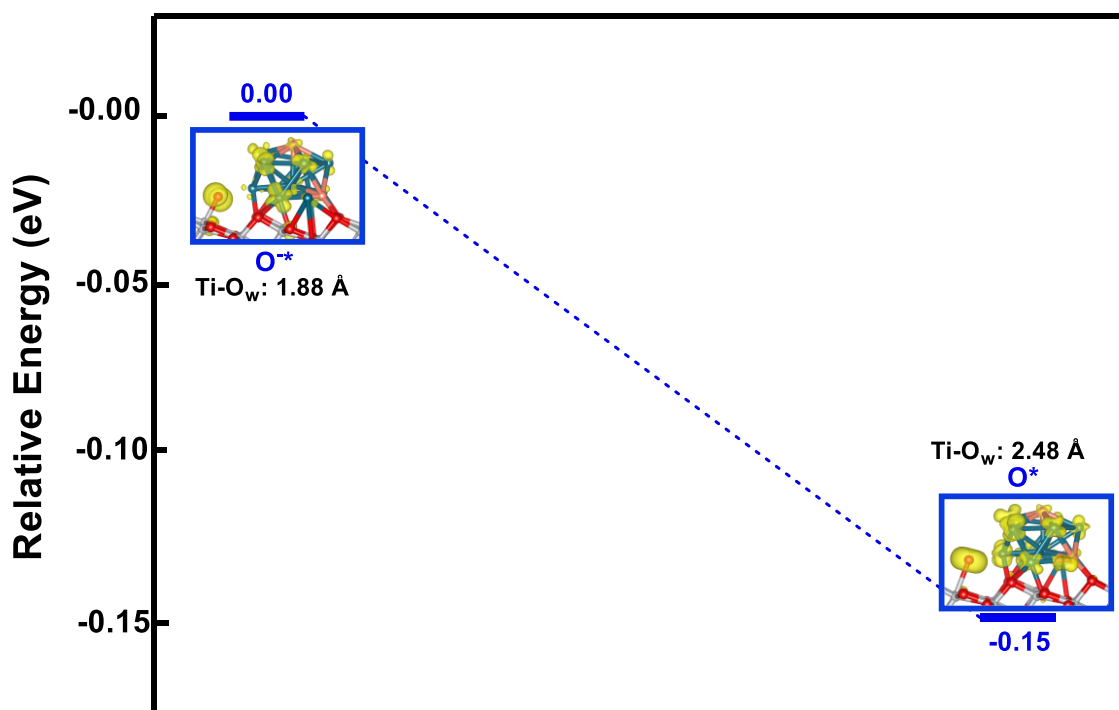

Figure S32. The process in which O<sup>-</sup> combines with a hole to form O is exothermic (0.15 eV), and the hole transfer barrier is taken from the literature<sup>8</sup>.



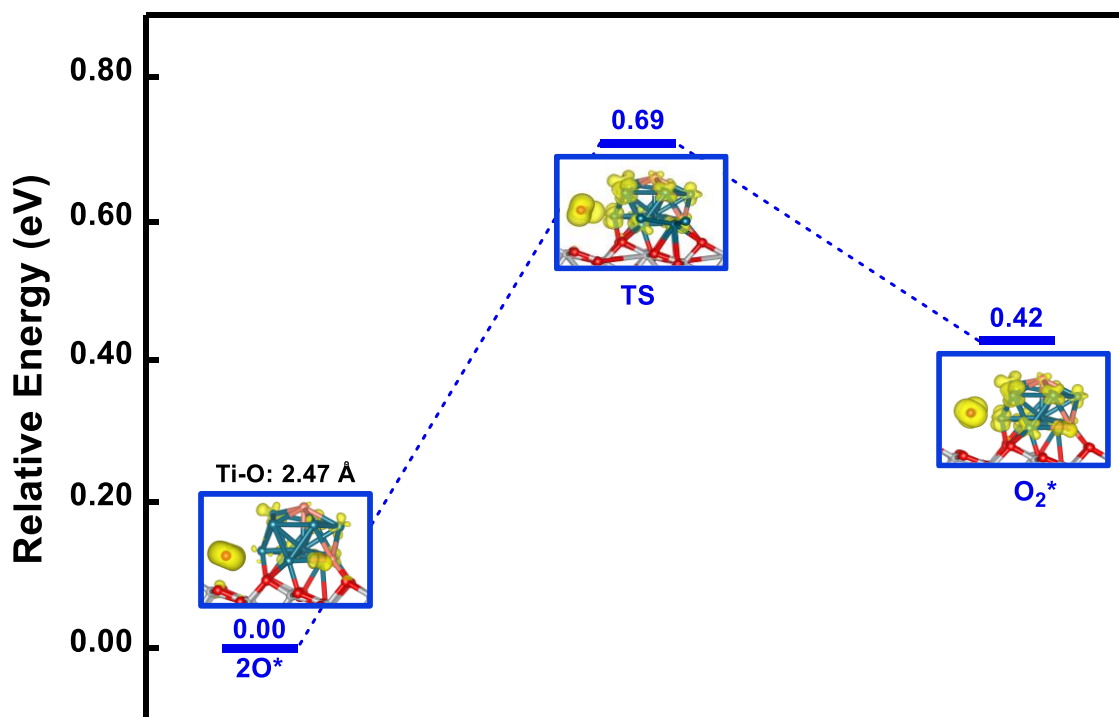

Figure S33. The reaction pathway for  $O_2$  formation via forming a bond between two O atoms.

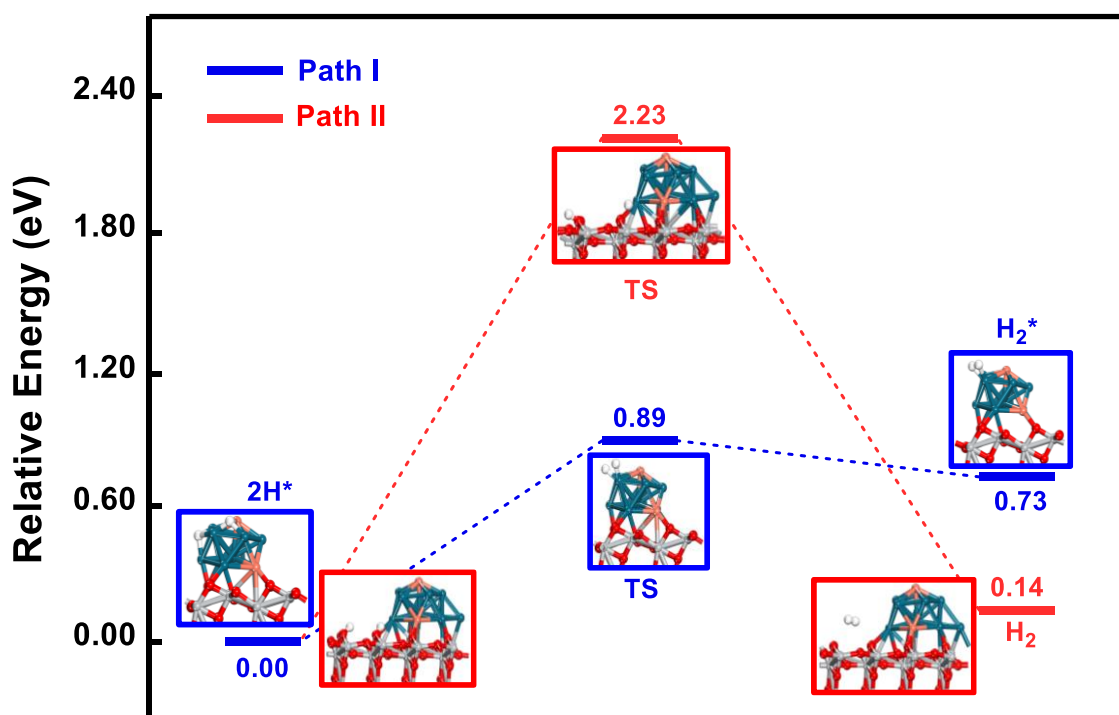

Figure S34. The reaction routes for  $H_2$  formation from H (path I) and  $H^+$  (path II) resulting from water dissociation.

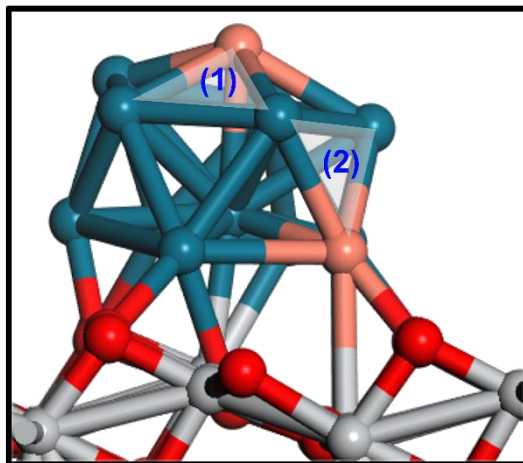

Figure S35. The two Pd<sub>2</sub>Cu<sub>1</sub> adsorption sites. (1) adsorbs the H atom and (2) adsorbs the \*CO molecule.

# Tables

Table S1. HSE06 + D3 Calculated the Adsorption Energies of the Pd<sub>11</sub>Cu<sub>2</sub> Clusters with Different Positions of Two Doped Cu atoms on the TiO<sub>2</sub>(101) Surface.

| Model                 | ISO-1 | ISO-2 | ISO-3 | ISO-4 |       |       |       |
|-----------------------|-------|-------|-------|-------|-------|-------|-------|
| E <sub>ads</sub> (eV) | 5.92  | 5.55  | 5.67  | 5.86  |       |       |       |
| Model                 | NEI-1 | NEI-2 | NEI-3 | NEI-4 | NEI-5 | NEI-6 | NEI-7 |
| E <sub>ads</sub> (eV) | 5.92  | 5.62  | 5.86  | 5.83  | 5.30  | 5.48  | 5.51  |

Table S2. The -ICOHP Values and Enthalpy Changes of the \*C\*O <-> H\*C\*O Process Related to the Eleven Models of Pd<sub>11</sub>Cu<sub>2</sub>@TiO<sub>2</sub> as well as Selected Energy Barriers.

| Model                                                | ISO-1     | ISO-2     | ISO-3     | ISO-4     | ISO-5     | ISO-6     |
|------------------------------------------------------|-----------|-----------|-----------|-----------|-----------|-----------|
| -ICOHP (α/β)                                         | 1.64/1.76 | 2.20/2.24 | 2.19/2.17 | 3.04/4.32 | 2.22/2.71 | 3.47/3.49 |
| ΔE (eV)<br>(E <sub>H*C*O</sub> - E <sub>*C*O</sub> ) | -0.60     | +0.67     | -0.43     | +0.47     | +0.48     | +0.45     |
| E <sub>TS</sub> (eV)                                 | 0.11      | 1.42      | 0.15      | /         |           |           |
| Model                                                | ISO-7     | ISO-8     | NEI-1     | NEI-2     | NEI-3     | NEI-4     |
| -ICOHP (α/β)                                         | 2.27/2.63 | 3.07/3.03 | 2.59/2.53 | 4.70/5.58 | 2.21/2.88 | 3.66/3.26 |
| ΔE (eV)<br>(E <sub>H*C*O</sub> - E <sub>*C*O</sub> ) | +1.23     | +0.50     | +0.16     | +0.71     | +0.21     | +0.58     |
| E <sub>TS</sub> (eV)                                 |           |           | 0.32      | 1.21      | 0.39      | /         |
| Model                                                | NEI-5     | NEI-6     | NEI-7     | NEI-8     |           |           |
| -ICOHP (α/β)                                         | 4.09/5.00 | 1.66/2.24 | 2.76/3.01 | 1.95/2.23 |           |           |
| ΔE (eV)<br>(E <sub>H*C*O</sub> - E <sub>*C*O</sub> ) | +0.71     | +1.2      | +1.04     | +0.73     |           |           |
| E <sub>TS</sub> (eV)                                 | /         | /         | /         |           |           |           |

Table S3. List about Reversibility ( $Z_i$ ), Forward Reaction Rate Constants ( $k^+$ ), Net Reaction Rates ( $r_{net}$ ), Gibbs Free Energy Changes ( $\Delta G$ ), and Gibbs Energy Barriers ( $E_a$ ) for all Elementary Reactions Considered in the Microkinetic Simulation.  $\Delta G$  and  $E_a$  are Corrected with Entropy Effects and Zero-Point Energy (ZPE) Included. Adsorption or Desorption Process of Gas Molecule is Calculated with the Collision Theory (see Section I). #1, #2, #3, #4, #5 and #6 represent Ti<sub>5c</sub>, O<sub>2b</sub>, Pd<sub>2</sub>Cu<sub>1</sub> (adsorbing H), interface, Pd<sub>2</sub>Cu<sub>1</sub> (adsorbing \*CO) and Pd<sub>3</sub> sites.

| Step i |                                                                  | $Z_i$     | $k^+$    | $r_{net}$ | $\Delta G$ | $E_a$ |
|--------|------------------------------------------------------------------|-----------|----------|-----------|------------|-------|
| R1     | H <sub>2</sub> O(l)+#1<->H <sub>2</sub> O#1                      | 0.99      | 5.01e+08 | 4.05e-14  | -0.71      | -     |
| R2     | H <sub>2</sub> O#1+#2<->H <sup>+</sup> #2+OH <sup>-</sup> #1     | 0.99      | 1.13e+03 | 2.06e-04  | 0.12       | 0.58  |
| R3     | H <sub>2</sub> O#1+#3<->H#3+OH <sup>-</sup> #1+e <sup>-</sup>    | 1.0       | 2.45e+03 | -2.06e-04 | -0.06      | 0.56  |
| R4     | OH <sup>-</sup> #1+h <sup>+</sup> <->OH#1                        | 0.99      | 2.49e+04 | 4.05e-14  | 0.17       | 0.50  |
| R5     | OH#1+#3<->O#1+H#3                                                | 6.55e-03  | 3.17e-04 | 9.64e-13  | -0.34      | 0.97  |
| R6     | OH#1+#2<->O <sup>-</sup> #1+H <sup>+</sup> #2                    | 1.0       | 2.58e+06 | -9.24e-13 | 0.12       | 0.38  |
| R7     | O <sup>-</sup> #1+h <sup>+</sup> <->O#1                          | 1.0       | 2.49e+04 | -9.24e-13 | -0.15      | 0.50  |
| R8     | 2O#1<->O <sub>2</sub> +2#1                                       | 1.11e-11  | 1.89e-04 | 2.02e-14  | 0.68       | 0.75  |
| R9     | 2H#3<->H <sub>2</sub> +2#3                                       | 1.22      | 1.03e-03 | -2.24e-04 | 0.72       | 0.77  |
| R10    | 2H <sup>+</sup> #2+2e <sup>-</sup> <->H <sub>2</sub> +2#2        | 9.59e-14  | 2.50e-17 | 1.12e-17  | -0.42      | 1.75  |
| R11    | CO <sub>2</sub> + #4<->CO <sub>2</sub> #4                        | 3.68e-03  | 9.56e+08 | 3.69e-05  | -1.08      | -     |
| R12    | CO <sub>2</sub> #4+H <sup>+</sup> #2+e <sup>-</sup> <->OCHO#4+#2 | 3.44e+05  | 4.84e-02 | -1.81e-05 | 0.18       | 0.84  |
| R13    | OCHO#4+H <sup>+</sup> #2+e <sup>-</sup> <->HCOOH#4+#2            | 1.0       | 2.83e+11 | -1.81e-05 | -0.04      | 0.08  |
| R14    | HCOOH#4<->HCOOH(l)+#4                                            | 8.86e+12  | 1.99e-13 | -1.81e-05 | 1.29       | -     |
| R15    | CO <sub>2</sub> #4 + H#2 <-> OCOH#4+#2                           | 0.99      | 2.88e+12 | 5.51e-05  | -0.04      | 0.02  |
| R16    | CO <sub>2</sub> #4 + #5 <-> CO#5 + O#4                           | 1.88e+14  | 2.23e-02 | -2.39e-24 | -0.66      | 0.86  |
| R17    | O#4+H <sub>p</sub> #2+e <sup>-</sup> <-> OH#4 + #2               | 1.00      | 9.04e+11 | -2.39e-24 | -0.48      | 0.05  |
| R18    | CO#5<->CO(g)+#5                                                  | 6.59e+11  | 3.62e-36 | -2.39e-24 | 2.65       | -     |
| R19    | OCOH#4+H#2<->CO#4+H <sub>2</sub> O+#2                            | 1.48e-22  | 5.30e+03 | 5.51e-05  | -0.99      | 0.54  |
| R20    | CO#4+H#3<->HCO#4+#3                                              | 4.49 e-01 | 2.78e+10 | 5.51e-05  | -0.6       | 0.14  |
| R21    | CO#4+ H#2<->COH#4+#2                                             | 1.22e+15  | 1.86e-12 | -5.44e-12 | 1.22       | 1.46  |
| R22    | COH#4 + H#3<->HCOH#4+ #3                                         | 2.50e+05  | 7.66e+02 | -5.44e-12 | -0.03      | 0.59  |
| R23    | HCO#4 + H#2<->HCOH#4 + #2                                        | 0.99      | 1.13e+03 | 5.51e-05  | 0.55       | 0.58  |
| R24    | HCO#4 + H#3<->CH <sub>2</sub> O#4 + #3                           | 0.99      | 2.23e-02 | 1.54e-14  | 0.70       | 0.86  |
| R25    | HCOH#4+H#3<->CH <sub>2</sub> OH#4+#3                             | 1.69e+02  | 3.54e+02 | -2.89e-06 | 0.31       | 0.61  |
| R26    | HCOH#4+#6<->CH#6+OH#4                                            | 4.22e-10  | 1.19e+06 | 5.79e-05  | -0.78      | 0.40  |
| R27    | CH <sub>2</sub> O#4+H#2<->CH <sub>2</sub> OH#4+#2                | 3.73e+03  | 3.29e-23 | -1.28e-29 | 0.24       | 2.10  |
| R28    | CH <sub>2</sub> O#4+H#3<->CH <sub>3</sub> O#4+#3                 | 4.77e-04  | 9.92e-05 | 1.54e-14  | 0.40       | 1.00  |
| R29    | CH <sub>3</sub> O#4+H#2<->CH <sub>3</sub> OH#4+#2                | 1.13e-02  | 7.66e+02 | 1.54e-14  | -0.46      | 0.59  |
| R30    | OH#4 + H#2<->H <sub>2</sub> O#4+#2                               | 0.99      | 1.33e+12 | 7.68e-05  | -0.13      | 0.04  |



|            |                                                                                   |          |          |           |       |      |
|------------|-----------------------------------------------------------------------------------|----------|----------|-----------|-------|------|
| <b>R31</b> | $\text{H}_2\text{O}\#4 \leftrightarrow \text{H}_2\text{O}(\text{l})+\#4$          | 0.95     | 1.77e-03 | 7.68e-05  | 0.71  | -    |
| <b>R32</b> | $\text{CH}\#6+\text{H}\#3 \leftrightarrow \text{CH}_2\#6 + \#3$                   | 0.91     | 7.39e+00 | 5.79e-05  | 0.46  | 0.71 |
| <b>R33</b> | $\text{CH}_2\text{OH}\#4+\#3 \leftrightarrow \text{CH}_2\#6+\text{OH}\#4$         | 2.07e-17 | 1.72e+05 | 1.88e-05  | -0.93 | 0.45 |
| <b>R34</b> | $\text{CH}_2\#6+\text{H}\#3 \leftrightarrow \text{CH}_3\#6+\#3$                   | 1.91e-04 | 2.49e+04 | 7.68e-05  | 0.14  | 0.50 |
| <b>R35</b> | $\text{CH}_3\#6+\text{H}\#3 \leftrightarrow \text{CH}_4+\#3+\#6$                  | 0.99     | 4.25e+12 | 7.68e-05  | -0.22 | 0.01 |
| <b>R36</b> | $\text{CH}_2\text{OH}\#4+\text{H}\#3 \leftrightarrow \text{CH}_3\text{OH}\#4+\#3$ | 5.63e+02 | 3.54e+02 | -2.17e-05 | 0.39  | 0.61 |
| <b>R37</b> | $\text{CH}_3\text{OH}\#4 \leftrightarrow \text{CH}_3\text{OH}(\text{l})+\#4$      | 1.11e+17 | 5.28e-12 | -2.17e-05 | 1.04  | -    |
| <b>R38</b> | $\text{CH}_3\text{OH}\#4+\#6 \leftrightarrow \text{CH}_3\#6+\text{OH}\#4$         | 1.24e-13 | 3.17e-04 | 1.18e-14  | -0.57 | 0.97 |

Table S4. Computed Coverages of Surface Species at #1, #2, #3, #4, #5, and #6.

| #1 (Ti <sub>5c</sub> site) |          |          |                 |                |          |
|----------------------------|----------|----------|-----------------|----------------|----------|
| H <sub>2</sub> O           | O        | OH       | OH <sup>-</sup> | O <sup>-</sup> | #1       |
| 0.99                       | 1.03e-05 | 6.58e-06 | 4.72e-03        | 3.12e-08       | 2.12e-14 |

| #2 (O <sub>2b</sub> site) |      | #3 (Pd <sub>2</sub> Cu <sub>1</sub> site) |          |
|---------------------------|------|-------------------------------------------|----------|
| H <sup>+</sup>            | #2   | H                                         | #3       |
| 0.67                      | 0.33 | 0.99                                      | 4.66e-04 |

| #4 (interface site) |                    |                   |                    |          |          |
|---------------------|--------------------|-------------------|--------------------|----------|----------|
| CH <sub>2</sub> O   | CH <sub>2</sub> OH | CH <sub>3</sub> O | CH <sub>3</sub> OH | HCOOH    | CO       |
| 1.55e-10            | 1.09e-10           | 3.03e-17          | 3.71e-11           | 1.03e-05 | 3.59e-15 |
| CO <sub>2</sub>     | COH                | H <sub>2</sub> O  | HCO                | HCOH     | O        |
| 1.62e-09            | 2.84e-20           | 0.96              | 4.15e-02           | 4.86e-11 | 1.31e-11 |
| OCHO                | OCOH               | OH                | #4                 |          |          |
| 1.08e-06            | 1.55e-08           | 3.08e-03          | 1.94e-14           |          |          |

| #5 (Pd <sub>2</sub> Cu <sub>1</sub> site) |    | #6 (Pd <sub>3</sub> site) |                 |                 |      |
|-------------------------------------------|----|---------------------------|-----------------|-----------------|------|
| CO                                        | #5 | CH                        | CH <sub>2</sub> | CH <sub>3</sub> | #6   |
| 1                                         | 0  | 8.46e-05                  | 3.08e-09        | 5.63e-12        | 0.99 |

Table S5. Reaction Rates of R14 and R37 at Different Concentrations (mol/L) of HCOOH and CH<sub>3</sub>OH, along with  $X_{RC}$  of Key Steps.

| R14:<br>HCOOH#4<->HCOOH(l)+#4                          | R37:<br>CH3OH#4<->CH3OH(l)+#4 | Key Rate Steps        | $X_{RC}$ |
|--------------------------------------------------------|-------------------------------|-----------------------|----------|
| C <sub>HCOOH</sub> = 10, C <sub>CH3OH</sub> = 10       |                               |                       |          |
| -1.32e-04                                              | -1.58e-04                     | HCOOH#4<->HCOOH(c)+#4 | 0.22     |
|                                                        |                               | HCOH#4+#6<->CH#6+OH#4 | 0.15     |
|                                                        |                               | H2O#4<->H2O(c)+#4     | 0.17     |
|                                                        |                               | CH3OH#4<->CH3OH(c)+#4 | 0.39     |
| C <sub>HCOOH</sub> = 1, C <sub>CH3OH</sub> = 1         |                               |                       |          |
| -1.81e-05                                              | -2.17e-05                     | CO2+#4<->CO2#4        | 0.43     |
|                                                        |                               | HCOOH#4<->HCOOH(c)+#4 | 0.21     |
|                                                        |                               | CH3OH#4<->CH3OH(c)+#4 | 0.27     |
| C <sub>HCOOH</sub> = 0.1, C <sub>CH3OH</sub> = 0.1     |                               |                       |          |
| -1.88e-06                                              | -2.25e-06                     | CO2+#4<->CO2#4        | 0.85     |
|                                                        |                               | HCOOH#4<->HCOOH(c)+#4 | 0.04     |
|                                                        |                               | CH3OH#4<->CH3OH(c)+#4 | 0.05     |
| C <sub>HCOOH</sub> = 0.01, C <sub>CH3OH</sub> = 0.01   |                               |                       |          |
| -1.88e-07                                              | -2.26e-07                     | CO2+#4<->CO2#4        | 0.94     |
| C <sub>HCOOH</sub> = 0.001, C <sub>CH3OH</sub> = 0.001 |                               |                       |          |
| -1.88e-08                                              | -2.26e-08                     | CO2+#4<->CO2#4        | 0.95     |

Table S6. Key Radicals Involved in Photocatalytic Splitting of Water, Including Bader Charges, Distances to Ti, and Magnetic Moments.

| <b>Radicals</b>       | <b>Bader Charge (e-)</b> | <b>Ti-O (Å)</b> | <b>Magnetic moment</b> |
|-----------------------|--------------------------|-----------------|------------------------|
| <b>OH</b>             | 7.05 (6.7[O]+0.35[H])    | 2.30            | 0.81                   |
| <b>OH<sup>-</sup></b> | 7.54 (7.23[O]+0.31[H])   | 1.79            | 0                      |
| <b>O</b>              | 6.03                     | 2.48            | 1.62                   |
| <b>O<sup>-</sup></b>  | 6.58                     | 1.89            | 0.89                   |
| <b>O<sup>2-</sup></b> | 6.93                     | 1.69            | 0.08                   |

## References

1. Dumesic, J. A. Analyses of Reaction Schemes Using De Donder Relations. *J. Catal.* **1999**, *185*, 496-505.
2. Campbell, C. T. The Degree of Rate Control: A Powerful Tool for Catalysis Research. *ACS Catal.* **2017**, *7*, 2770-2779.
3. Stegelmann, C.; Andreasen, A.; Campbell, C. T. Degree of Rate Control: How Much the Energies of Intermediates and Transition States Control Rates. *J. Am. Chem. Soc.* **2009**, *131*, 8077-8082.
4. Long, R.; Li, Y.; Liu, Y.; Chen, S.; Zheng, X.; Gao, C.; He, C.; Chen, N.; Qi, Z.; Song, L.; Jiang, J.; Zhu, J.; Xiong, Y. Isolation of Cu Atoms in Pd Lattice: Forming Highly Selective Sites for Photocatalytic Conversion of CO<sub>2</sub> to CH<sub>4</sub>. *J. Am. Chem. Soc.* **2017**, *139*, 4486-4492.
5. Ren, G.; Zhou, M.; Wang, H. Weakened Interfacial Hydrogen Bond Connectivity Drives Selective Photocatalytic Water Oxidation toward H<sub>2</sub>O<sub>2</sub> at Water/Brookite-TiO<sub>2</sub> Interface. *J. Am. Chem. Soc.* **2024**, *146*, 6084-6093.
6. Wang, D.; Sheng, T.; Chen, J.; Wang, H.-F.; Hu, P. Identifying the Key Obstacle in Photocatalytic Oxygen Evolution on Rutile TiO<sub>2</sub>. *Nat. Catal.* **2018**, *1*, 291-299.
7. Wang, D.; Wang, H. F.; Hu, P. Identifying the Distinct Features of Geometric Structures for Hole Trapping to Generate Radicals on Rutile TiO<sub>2</sub>(110) in Photooxidation Using Density Functional Theory Calculations with Hybrid Functional. *Phys. Chem. Chem. Phys.* **2015**, *17*, 1549-1555.
8. Deskins, N. A.; Dupuis, M. Intrinsic Hole Migration Rates in TiO<sub>2</sub> from Density Functional Theory. *J. Phys. Chem. C* **2009**, *113*, 346-358.
